# Supplementary material for: Accurate Classification of Differential Expression Patterns in a Bayesian Framework With Robust Normalization for Multi-Group RNA-Seq Count Data
Source: Bioinform Biol Insights. 2019 Jul 8;13:1177932219860817. doi: 10.1177/1177932219860817 (PMC6614939; doi:10.1177/1177932219860817)
Supplement: Additional1_xyz19222377f73da – Supplemental material for Accurate Classification of Differential Expression Patterns in a Bayesian Framework With Robust Normalization for Multi-Group RNA-Seq Count Data [file Additional1_xyz19222377f73da.xlsx]

## Sheet: Sheet1
	AUC values
	PG1	1/3	0.5	0.5	0.6	0.6	0.7	0.8
	PG2	1/3	0.3	0.4	0.2	0.3	0.2	0.1
	PG3	1/3	0.2	0.1	0.2	0.1	0.1	0.1
	PDEG = 0.05
	EEE-baySeq	90.3837	90.4278	90.4498	90.4841	90.4619	90.4653	90.559
	SSS-baySeq	90.3697	90.395	90.4064	90.4334	90.4258	90.4569	90.5837
	E-baySeq	90.381	90.3907	90.3845	90.3807	90.3692	90.3659	90.4456
	M-baySeq	90.4114	90.4453	90.3982	90.398	90.4159	90.444	90.5208
	EEE-EBSeq	85.7686	85.8746	85.8342	85.8698	85.7899	85.8249	85.9287
	SSS-EBSeq	85.7799	85.8807	85.8329	85.8616	85.7967	85.8126	85.9356
	S-EBSeq	85.7781	85.8623	85.7907	85.82	85.7344	85.7156	85.7755
	M-EBSeq	85.7271	85.8313	85.767	85.8168	85.746	85.7406	85.8463
	PDEG = 0.25
	EEE-baySeq	90.3789	90.3779	90.4819	90.4798	90.4888	90.628	90.7575
	SSS-baySeq	90.3517	90.3919	90.4833	90.4871	90.5014	90.6558	90.7722
	E-baySeq	90.3831	90.2347	90.2335	90.0331	90	89.7082	89.01
	M-baySeq	90.4023	90.3392	90.3775	90.3112	90.2724	90.2074	89.9547
	EEE-EBSeq	85.8171	85.8789	85.9232	85.9379	85.9707	85.9456	86.0629
	SSS-EBSeq	85.8247	85.8737	85.939	85.9546	85.9893	85.9856	86.1266
	S-EBSeq	85.8275	85.6275	85.5071	85.3478	85.3145	84.7527	84.0197
	M-EBSeq	85.7845	85.7639	85.7613	85.7019	85.7108	85.4751	85.2

## Sheet: Sheet2
	Accuracies
	PG1	1/3	0.5	0.5	0.6	0.6	0.7	0.8
	PG2	1/3	0.3	0.4	0.2	0.3	0.2	0.1
	PG3	1/3	0.2	0.1	0.2	0.1	0.1	0.1
	PDEG = 0.05
	EEE-baySeq	96.9703	97.0049	97.0153	97.0095	97.0208	97.0368	97.0736
	SSS-baySeq	96.972	97.0051	97.0116	96.9999	97.0095	97.0408	97.0783
	E-baySeq	96.9739	97.0053	97.0049	96.9943	97.0006	97.0208	97.0497
	M-baySeq	96.9714	97.0089	97.008	97.0034	97.0057	97.0322	97.0529
	EEE-EBSeq	93.8566	93.8702	93.8839	93.8916	93.9199	93.9197	93.9399
	SSS-EBSeq	93.8588	93.8644	93.8816	93.8928	93.9172	93.9172	93.9434
	S-EBSeq	93.8299	93.8285	93.8423	93.8464	93.8702	93.8568	93.8577
	M-EBSeq	93.9015	93.9045	93.928	93.9221	93.9438	93.9489	93.9731
	PDEG = 0.25
	EEE-baySeq	87.3618	87.4413	87.5585	87.5725	87.6654	87.8035	88.0635
	SSS-baySeq	87.3527	87.4494	87.6009	87.5982	87.6638	87.819	88.0853
	E-baySeq	87.3711	87.3348	87.3903	87.3042	87.3258	87.2115	87.0885
	M-baySeq	87.3628	87.3857	87.4664	87.4356	87.4773	87.4802	87.5076
	EEE-EBSeq	85.0386	85.1451	85.2533	85.2912	85.3464	85.4665	85.7208
	SSS-EBSeq	85.0403	85.1467	85.2693	85.3077	85.3633	85.4973	85.77
	S-EBSeq	85.0448	84.8278	84.708	84.5272	84.4817	83.9161	83.0911
	M-EBSeq	85.094	85.0969	85.1565	85.1082	85.1351	84.991	84.8111

## Sheet: Sheet3
	Computation times (in seconds)
	PG1	1/3	0.5	0.5	0.6	0.6	0.7	0.8
	PG2	1/3	0.3	0.4	0.2	0.3	0.2	0.1
	PG3	1/3	0.2	0.1	0.2	0.1	0.1	0.1
	PDEG = 0.05
	EEE-baySeq	533.315	534.696	533.612	538.458	535.42	535.732	535.522
	SSS-baySeq	549.303	554.577	553.597	559.167	553.947	555.004	553.71
	E-baySeq	523.825	523.948	523.634	524.746	523.374	524.34	527.333
	M-baySeq	537.148	533.667	534.201	536.913	545.54	531.443	534.822
	EEE-EBSeq	169.437	161.046	162.993	154.336	154.048	164.742	166.359
	SSS-EBSeq	186.474	180.593	182.019	179.282	178.458	184.088	183.799
	S-EBSeq	156.384	151.651	152.292	148.742	150.802	150.303	157.102
	M-EBSeq	158.453	157.618	156.476	149.642	152.883	150.696	152.488
	PDEG = 0.25
	EEE-baySeq	549.835	544.21	549.39	547.66	565.443	542.981	543.69
	SSS-baySeq	561.993	559.648	560.957	558.729	578.125	560.428	560.977
	E-baySeq	538.557	534.207	537.667	535.154	555.299	531.948	534.067
	M-baySeq	539.584	540.411	539.881	538.98	538.658	523.64	523.4
	EEE-EBSeq	137.851	143.545	133.628	135.199	136.978	130.246	146.444
	SSS-EBSeq	154.929	158.634	146.98	149.886	151.553	149.246	166.921
	S-EBSeq	128.539	127.635	119.49	122.037	123.935	117.639	134.639
	M-EBSeq	130.423	130.73	120.574	124.598	115.708	120.023	130.158

## Sheet: Sheet4
Confusion matrices under PDEG = 0.05
		PG1 = 1/3	PG2 = 1/3	PG3 = 1/3					PG1 = 0.5	PG2 = 0.3	PG3 = 0.2					PG1 = 0.5	PG2 = 0.4	PG3 = 0.1					PG1 = 0.6	PG2 = 0.2	PG3 = 0.2					PG1 = 0.6	PG2 = 0.3	PG3 = 0.1					PG1 = 0.7	PG2 = 0.2	PG3 = 0.1					PG1 = 0.8	PG2 = 0.1	PG3 = 0.1
EEE-baySeq	nonDEG	DEG_G1	DEG_G2	DEG_G3	Total		EEE-baySeq	nonDEG	DEG_G1	DEG_G2	DEG_G3	Total		EEE-baySeq	nonDEG	DEG_G1	DEG_G2	DEG_G3	Total		EEE-baySeq	nonDEG	DEG_G1	DEG_G2	DEG_G3	Total		EEE-baySeq	nonDEG	DEG_G1	DEG_G2	DEG_G3	Total		EEE-baySeq	nonDEG	DEG_G1	DEG_G2	DEG_G3	Total		EEE-baySeq	nonDEG	DEG_G1	DEG_G2	DEG_G3	Total
nonDEG	9476.13	92.12	93.47	93.22	9754.94		nonDEG	9477.74	136.36	83.39	56.23	9753.72		nonDEG	9477.69	136.13	110.32	28.39	9752.53		nonDEG	9476.9	161.57	56.71	56.52	9751.7		nonDEG	9477.82	162	84.16	28.29	9752.27		nonDEG	9476.88	186.59	56.96	28.37	9748.8		nonDEG	9477.24	212.11	28.39	28.46	9746.2
DEG_G1	7.77	74.43	0.22	0.16	82.58		DEG_G1	8.95	113.05	0.27	0.2	122.47		DEG_G1	8.79	113.22	0.31	0.06	122.38		DEG_G1	9.49	137.9	0.21	0.16	147.76		DEG_G1	9.27	137.4	0.29	0.09	147.05		DEG_G1	10.32	162.75	0.17	0.2	173.44		DEG_G1	11.18	187.19	0.08	0.1	198.55
DEG_G2	7.37	0.22	73.04	0.19	80.82		DEG_G2	7.15	0.37	66.19	0.06	73.77		DEG_G2	7.46	0.44	89.09	0.02	97.01		DEG_G2	6.99	0.32	42.96	0.13	50.4		DEG_G2	7.27	0.4	65.35	0.11	73.13		DEG_G2	6.78	0.4	42.7	0.08	49.96		DEG_G2	5.62	0.41	21.5	0.01	27.54
DEG_G3	7.73	0.23	0.27	73.43	81.66		DEG_G3	6.16	0.22	0.15	43.51	50.04		DEG_G3	6.06	0.21	0.28	21.53	28.08		DEG_G3	6.62	0.21	0.12	43.19	50.14		DEG_G3	5.64	0.2	0.2	21.51	27.55		DEG_G3	6.02	0.26	0.17	21.35	27.8		DEG_G3	5.96	0.29	0.03	21.43	27.71
SSS-baySeq	nonDEG	DEG_G1	DEG_G2	DEG_G3	Total		SSS-baySeq	nonDEG	DEG_G1	DEG_G2	DEG_G3	Total		SSS-baySeq	nonDEG	DEG_G1	DEG_G2	DEG_G3	Total		SSS-baySeq	nonDEG	DEG_G1	DEG_G2	DEG_G3	Total		SSS-baySeq	nonDEG	DEG_G1	DEG_G2	DEG_G3	Total		SSS-baySeq	nonDEG	DEG_G1	DEG_G2	DEG_G3	Total		SSS-baySeq	nonDEG	DEG_G1	DEG_G2	DEG_G3	Total
nonDEG	9476.48	92.59	93.44	92.94	9755.45		nonDEG	9478.09	136.77	83.32	56.25	9754.43		nonDEG	9477.85	136.49	110.41	28.37	9753.12		nonDEG	9476.91	161.95	57	56.79	9752.65		nonDEG	9477.16	162.09	84.47	28.28	9752		nonDEG	9476.91	186.45	56.74	28.37	9748.47		nonDEG	9477.24	211.48	28.44	28.53	9745.69
DEG_G1	7.59	73.95	0.21	0.13	81.88		DEG_G1	8.49	112.71	0.32	0.19	121.71		DEG_G1	8.75	112.86	0.4	0.06	122.07		DEG_G1	9.36	137.51	0.2	0.17	147.24		DEG_G1	9.65	137.27	0.26	0.12	147.3		DEG_G1	10.24	162.89	0.19	0.2	173.52		DEG_G1	11.17	187.81	0.1	0.1	199.18
DEG_G2	7.43	0.25	73.05	0.21	80.94		DEG_G2	6.93	0.3	66.22	0.07	73.52		DEG_G2	7.28	0.42	88.9	0.02	96.62		DEG_G2	7.04	0.32	42.68	0.15	50.19		DEG_G2	7.27	0.41	65.03	0.11	72.82		DEG_G2	6.69	0.46	42.92	0.07	50.14		DEG_G2	5.54	0.41	21.42	0.01	27.38
DEG_G3	7.5	0.21	0.3	73.72	81.73		DEG_G3	6.49	0.22	0.14	43.49	50.34		DEG_G3	6.12	0.23	0.29	21.55	28.19		DEG_G3	6.69	0.22	0.12	42.89	49.92		DEG_G3	5.92	0.23	0.24	21.49	27.88		DEG_G3	6.16	0.2	0.15	21.36	27.87		DEG_G3	6.05	0.3	0.04	21.36	27.75
E-baySeq	nonDEG	DEG_G1	DEG_G2	DEG_G3	Total		E-baySeq	nonDEG	DEG_G1	DEG_G2	DEG_G3	Total		E-baySeq	nonDEG	DEG_G1	DEG_G2	DEG_G3	Total		E-baySeq	nonDEG	DEG_G1	DEG_G2	DEG_G3	Total		E-baySeq	nonDEG	DEG_G1	DEG_G2	DEG_G3	Total		E-baySeq	nonDEG	DEG_G1	DEG_G2	DEG_G3	Total		E-baySeq	nonDEG	DEG_G1	DEG_G2	DEG_G3	Total
nonDEG	9476.23	92.39	93.37	92.73	9754.72		nonDEG	9477.76	136.98	83.1	55.86	9753.7		nonDEG	9477.58	136.98	110.54	28.26	9753.36		nonDEG	9476.77	163.08	56.64	56.39	9752.88		nonDEG	9477.38	163.42	84.34	28.23	9753.37		nonDEG	9476.93	188.44	56.8	28.42	9750.59		nonDEG	9477.51	214.95	28.4	28.27	9749.13
DEG_G1	7.81	74.19	0.2	0.2	82.4		DEG_G1	8.55	112.43	0.29	0.19	121.46		DEG_G1	8.65	112.39	0.36	0.05	121.45		DEG_G1	9.38	136.37	0.22	0.19	146.16		DEG_G1	9.46	135.98	0.31	0.1	145.85		DEG_G1	10.16	161	0.23	0.2	171.59		DEG_G1	10.91	184.35	0.07	0.1	195.43
DEG_G2	7.4	0.24	73.1	0.2	80.94		DEG_G2	7.18	0.32	66.48	0.09	74.07		DEG_G2	7.46	0.45	88.85	0.02	96.78		DEG_G2	7.09	0.28	43	0.13	50.5		DEG_G2	7.25	0.38	65.12	0.09	72.84		DEG_G2	6.74	0.34	42.84	0.07	49.99		DEG_G2	5.58	0.4	21.49	0.01	27.48
DEG_G3	7.56	0.18	0.33	73.87	81.94		DEG_G3	6.51	0.27	0.13	43.86	50.77		DEG_G3	6.31	0.18	0.25	21.67	28.41		DEG_G3	6.76	0.27	0.14	43.29	50.46		DEG_G3	5.91	0.22	0.23	21.58	27.94		DEG_G3	6.17	0.22	0.13	21.31	27.83		DEG_G3	6	0.3	0.04	21.62	27.96
M-baySeq	nonDEG	DEG_G1	DEG_G2	DEG_G3	Total		M-baySeq	nonDEG	DEG_G1	DEG_G2	DEG_G3	Total		M-baySeq	nonDEG	DEG_G1	DEG_G2	DEG_G3	Total		M-baySeq	nonDEG	DEG_G1	DEG_G2	DEG_G3	Total		M-baySeq	nonDEG	DEG_G1	DEG_G2	DEG_G3	Total		M-baySeq	nonDEG	DEG_G1	DEG_G2	DEG_G3	Total		M-baySeq	nonDEG	DEG_G1	DEG_G2	DEG_G3	Total
nonDEG	9476.5	92.43	93.44	93.13	9755.5		nonDEG	9478.08	136.8	83.17	55.96	9754.01		nonDEG	9477.89	136.7	110.74	28.31	9753.64		nonDEG	9477.15	162.44	56.76	56.47	9752.82		nonDEG	9477.58	163.14	84.29	28.24	9753.25		nonDEG	9477.44	187.83	56.85	28.29	9750.41		nonDEG	9477.11	213.64	28.63	28.63	9748.01
DEG_G1	7.66	74.13	0.21	0.18	82.18		DEG_G1	8.57	112.63	0.28	0.19	121.67		DEG_G1	8.63	112.7	0.38	0.06	121.77		DEG_G1	9.41	137.03	0.21	0.17	146.82		DEG_G1	9.46	136.27	0.31	0.1	146.14		DEG_G1	9.9	161.55	0.18	0.21	171.84		DEG_G1	11.21	185.66	0.08	0.09	197.04
DEG_G2	7.34	0.23	73.05	0.23	80.85		DEG_G2	6.86	0.34	66.4	0.07	73.67		DEG_G2	7.39	0.47	88.59	0.01	96.46		DEG_G2	6.82	0.29	42.92	0.12	50.15		DEG_G2	7.11	0.37	65.17	0.11	72.76		DEG_G2	6.59	0.39	42.82	0.09	49.89		DEG_G2	5.55	0.36	21.25	0.01	27.17
DEG_G3	7.5	0.21	0.3	73.46	81.47		DEG_G3	6.49	0.23	0.15	43.78	50.65		DEG_G3	6.09	0.13	0.29	21.62	28.13		DEG_G3	6.62	0.24	0.11	43.24	50.21		DEG_G3	5.85	0.22	0.23	21.55	27.85		DEG_G3	6.07	0.23	0.15	21.41	27.86		DEG_G3	6.13	0.34	0.04	21.27	27.78
EEE-EBSeq	nonDEG	DEG_G1	DEG_G2	DEG_G3	Total		EEE-EBSeq	nonDEG	DEG_G1	DEG_G2	DEG_G3	Total		EEE-EBSeq	nonDEG	DEG_G1	DEG_G2	DEG_G3	Total		EEE-EBSeq	nonDEG	DEG_G1	DEG_G2	DEG_G3	Total		EEE-EBSeq	nonDEG	DEG_G1	DEG_G2	DEG_G3	Total		EEE-EBSeq	nonDEG	DEG_G1	DEG_G2	DEG_G3	Total		EEE-EBSeq	nonDEG	DEG_G1	DEG_G2	DEG_G3	Total
nonDEG	9090.39	62.7	63.77	64.36	9281.22		nonDEG	9090.32	93.52	57.61	37.93	9279.38		nonDEG	9090.99	93.4	76.31	19.09	9279.79		nonDEG	9091.18	111.43	38.94	37.93	9279.48		nonDEG	9093.91	111.17	57.98	19.26	9282.32		nonDEG	9092.59	129.66	38.92	19.25	9280.42		nonDEG	9092.67	147.3	19.44	19.53	9278.94
DEG_G1	136.89	99.49	2.49	2.66	241.53		DEG_G1	145.58	149.95	2.53	1.84	299.9		DEG_G1	145.8	150.04	3.3	0.84	299.98		DEG_G1	150.28	181.5	1.83	1.78	335.39		DEG_G1	151.31	181.61	2.65	0.99	336.56		DEG_G1	158.4	212.33	1.78	1.13	373.64		DEG_G1	163.5	243.44	0.89	1	408.83
DEG_G2	135.95	2.65	98.21	2.41	239.22		DEG_G2	133.7	3.32	87.87	1.35	226.24		DEG_G2	139.08	3.59	117.99	0.7	261.36		DEG_G2	127.69	3.47	57.77	1.58	190.51		DEG_G2	131.43	3.71	87.54	0.82	223.5		DEG_G2	125.52	4.11	57.98	0.55	188.16		DEG_G2	120.97	4.82	28.9	0.49	155.18
DEG_G3	135.77	2.16	2.53	97.57	238.03		DEG_G3	130.4	3.21	1.99	58.88	194.48		DEG_G3	124.13	2.97	2.4	29.37	158.87		DEG_G3	130.85	3.6	1.46	58.71	194.62		DEG_G3	123.35	3.51	1.83	28.93	157.62		DEG_G3	123.49	3.9	1.32	29.07	157.78		DEG_G3	122.86	4.44	0.77	28.98	157.05
SSS-EBSeq	nonDEG	DEG_G1	DEG_G2	DEG_G3	Total		SSS-EBSeq	nonDEG	DEG_G1	DEG_G2	DEG_G3	Total		SSS-EBSeq	nonDEG	DEG_G1	DEG_G2	DEG_G3	Total		SSS-EBSeq	nonDEG	DEG_G1	DEG_G2	DEG_G3	Total		SSS-EBSeq	nonDEG	DEG_G1	DEG_G2	DEG_G3	Total		SSS-EBSeq	nonDEG	DEG_G1	DEG_G2	DEG_G3	Total		SSS-EBSeq	nonDEG	DEG_G1	DEG_G2	DEG_G3	Total
nonDEG	9090.65	62.72	63.79	64.26	9281.42		nonDEG	9089.94	93.57	57.75	37.99	9279.25		nonDEG	9090.8	93.38	76.36	19.08	9279.62		nonDEG	9091.36	111.42	38.97	37.95	9279.7		nonDEG	9093.64	111.17	57.97	19.24	9282.02		nonDEG	9092.5	129.75	38.93	19.26	9280.44		nonDEG	9092.88	147.17	19.49	19.53	9279.07
DEG_G1	136.79	99.4	2.51	2.68	241.38		DEG_G1	146	149.91	2.52	1.84	300.27		DEG_G1	145.86	150.05	3.33	0.83	300.07		DEG_G1	150.23	181.53	1.83	1.78	335.37		DEG_G1	151.61	181.6	2.63	0.99	336.83		DEG_G1	158.11	212.19	1.78	1.14	373.22		DEG_G1	163.35	243.61	0.88	1	408.84
DEG_G2	135.59	2.68	98.18	2.41	238.86		DEG_G2	133.33	3.3	87.75	1.33	225.71		DEG_G2	139	3.56	117.93	0.71	261.2		DEG_G2	127.71	3.46	57.74	1.62	190.53		DEG_G2	131.35	3.72	87.53	0.82	223.42		DEG_G2	125.8	4.09	57.97	0.54	188.4		DEG_G2	120.62	4.81	28.87	0.49	154.79
DEG_G3	135.97	2.2	2.52	97.65	238.34		DEG_G3	130.73	3.22	1.98	58.84	194.77		DEG_G3	124.34	3.01	2.38	29.38	159.11		DEG_G3	130.7	3.59	1.46	58.65	194.4		DEG_G3	123.4	3.51	1.87	28.95	157.73		DEG_G3	123.59	3.97	1.32	29.06	157.94		DEG_G3	123.15	4.41	0.76	28.98	157.3
S-EBSeq	nonDEG	DEG_G1	DEG_G2	DEG_G3	Total		S-EBSeq	nonDEG	DEG_G1	DEG_G2	DEG_G3	Total		S-EBSeq	nonDEG	DEG_G1	DEG_G2	DEG_G3	Total		S-EBSeq	nonDEG	DEG_G1	DEG_G2	DEG_G3	Total		S-EBSeq	nonDEG	DEG_G1	DEG_G2	DEG_G3	Total		S-EBSeq	nonDEG	DEG_G1	DEG_G2	DEG_G3	Total		S-EBSeq	nonDEG	DEG_G1	DEG_G2	DEG_G3	Total
nonDEG	9087.48	62.54	63.66	64.17	9277.85		nonDEG	9086.39	93.98	57.51	37.62	9275.5		nonDEG	9086.94	93.54	76.31	18.89	9275.68		nonDEG	9087.13	112.26	38.73	37.68	9275.8		nonDEG	9089.54	112.07	57.78	19.02	9278.41		nonDEG	9087.47	131.18	38.59	19.02	9276.26		nonDEG	9086.52	149.5	19.28	19.35	9274.65
DEG_G1	138.07	99.54	2.52	2.71	242.84		DEG_G1	147.69	149.41	2.62	1.93	301.65		DEG_G1	147.68	149.83	3.49	0.82	301.82		DEG_G1	152.68	180.59	1.85	1.85	336.97		DEG_G1	153.9	180.63	2.76	1.02	338.31		DEG_G1	161.58	210.72	1.92	1.18	375.4		DEG_G1	167.76	241.12	1.01	1.09	410.98
DEG_G2	136.35	2.68	98.23	2.38	239.64		DEG_G2	134.37	3.42	87.95	1.35	227.09		DEG_G2	140.15	3.75	117.88	0.71	262.49		DEG_G2	128.54	3.54	58	1.55	191.63		DEG_G2	132.31	3.87	87.67	0.78	224.63		DEG_G2	126.43	4.21	58.24	0.55	189.43		DEG_G2	121.93	4.9	29.03	0.46	156.32
DEG_G3	137.1	2.24	2.59	97.74	239.67		DEG_G3	131.55	3.19	1.92	59.1	195.76		DEG_G3	125.23	2.88	2.32	29.58	160.01		DEG_G3	131.65	3.61	1.42	58.92	195.6		DEG_G3	124.25	3.43	1.79	29.18	158.65		DEG_G3	124.52	3.89	1.25	29.25	158.91		DEG_G3	123.79	4.48	0.68	29.1	158.05
M-EBSeq	nonDEG	DEG_G1	DEG_G2	DEG_G3	Total		M-EBSeq	nonDEG	DEG_G1	DEG_G2	DEG_G3	Total		M-EBSeq	nonDEG	DEG_G1	DEG_G2	DEG_G3	Total		M-EBSeq	nonDEG	DEG_G1	DEG_G2	DEG_G3	Total		M-EBSeq	nonDEG	DEG_G1	DEG_G2	DEG_G3	Total		M-EBSeq	nonDEG	DEG_G1	DEG_G2	DEG_G3	Total		M-EBSeq	nonDEG	DEG_G1	DEG_G2	DEG_G3	Total
nonDEG	9095	62.89	63.8	64.24	9285.93		nonDEG	9094.24	93.8	57.91	38.06	9284.01		nonDEG	9095.76	93.54	76.62	19.04	9284.96		nonDEG	9094.82	112.17	38.85	37.99	9283.83		nonDEG	9097.14	111.83	58.04	19.39	9286.4		nonDEG	9096.37	130.69	38.93	19.16	9285.15		nonDEG	9097.13	148.66	19.37	19.55	9284.71
DEG_G1	134.53	99.28	2.53	2.64	238.98		DEG_G1	144.71	149.79	2.54	1.81	298.85		DEG_G1	144.31	149.93	3.32	0.81	298.37		DEG_G1	148.93	180.9	1.85	1.82	333.5		DEG_G1	150.87	180.99	2.71	0.97	335.54		DEG_G1	157.6	211.37	1.81	1.13	371.91		DEG_G1	162.24	242.25	0.93	1.03	406.45
DEG_G2	134.37	2.62	98.14	2.39	237.52		DEG_G2	132.56	3.29	87.6	1.31	224.76		DEG_G2	137.4	3.62	117.67	0.71	259.4		DEG_G2	126.71	3.48	57.88	1.58	189.65		DEG_G2	130	3.74	87.4	0.79	221.93		DEG_G2	123.5	4.09	57.99	0.55	186.13		DEG_G2	119.53	4.76	28.96	0.45	153.7
DEG_G3	135.1	2.21	2.53	97.73	237.57		DEG_G3	128.49	3.12	1.95	58.82	192.38		DEG_G3	122.53	2.91	2.39	29.44	157.27		DEG_G3	129.54	3.45	1.42	58.61	193.02		DEG_G3	121.99	3.44	1.85	28.85	156.13		DEG_G3	122.53	3.85	1.27	29.16	156.81		DEG_G3	121.1	4.33	0.74	28.97	155.14
Confusion matrices under PDEG = 0.25
		PG1 = 1/3	PG2 = 1/3	PG3 = 1/3					PG1 = 0.5	PG2 = 0.3	PG3 = 0.2					PG1 = 0.5	PG2 = 0.4	PG3 = 0.1					PG1 = 0.6	PG2 = 0.2	PG3 = 0.2					PG1 = 0.6	PG2 = 0.3	PG3 = 0.1					PG1 = 0.7	PG2 = 0.2	PG3 = 0.1					PG1 = 0.8	PG2 = 0.1	PG3 = 0.1
EEE-baySeq	nonDEG	DEG_G1	DEG_G2	DEG_G3	Total		EEE-baySeq	nonDEG	DEG_G1	DEG_G2	DEG_G3	Total		EEE-baySeq	nonDEG	DEG_G1	DEG_G2	DEG_G3	Total		EEE-baySeq	nonDEG	DEG_G1	DEG_G2	DEG_G3	Total		EEE-baySeq	nonDEG	DEG_G1	DEG_G2	DEG_G3	Total		EEE-baySeq	nonDEG	DEG_G1	DEG_G2	DEG_G3	Total		EEE-baySeq	nonDEG	DEG_G1	DEG_G2	DEG_G3	Total
nonDEG	7443.04	394.25	398.71	393.76	8629.76		nonDEG	7443.41	573.68	359.91	247.57	8624.57		nonDEG	7443.7	573.36	467.62	129.34	8614.02		nonDEG	7443.07	674.04	246.72	247.03	8610.86		nonDEG	7443.09	673.53	356.7	129.01	8602.33		nonDEG	7441.85	771.89	245.6	128.68	8588.02		nonDEG	7441.51	866.61	127.2	128.85	8564.17
DEG_G1	19.42	432.5	3.07	3.12	458.11		DEG_G1	25.19	669.27	4.22	2.77	701.45		DEG_G1	25.39	669.22	5.39	1.66	701.66		DEG_G1	30.25	818.05	3.6	3.56	855.46		DEG_G1	29.77	818.85	5.2	1.76	855.58		DEG_G1	34.32	970.58	3.87	2.21	1010.98		DEG_G1	38.84	1126.95	2.61	2.64	1171.04
DEG_G2	19.26	3.19	427.93	3.41	453.79		DEG_G2	18.1	4.06	383.62	1.83	407.61		DEG_G2	21.73	5.13	525.27	1.34	553.47		DEG_G2	13.74	3.86	248.33	1.61	267.54		DEG_G2	17.85	4.98	386.45	1.08	410.36		DEG_G2	13.94	4.48	249.55	0.74	268.71		DEG_G2	9.83	3	119.88	0.5	133.21
DEG_G3	19.28	3.06	3.29	432.71	458.34		DEG_G3	13.3	2.99	2.25	247.83	266.37		DEG_G3	9.18	2.29	1.72	117.66	130.85		DEG_G3	12.94	4.05	1.35	247.8	266.14		DEG_G3	9.29	2.64	1.65	118.15	131.73		DEG_G3	9.89	3.05	0.98	118.37	132.29		DEG_G3	9.82	3.44	0.31	118.01	131.58
SSS-baySeq	nonDEG	DEG_G1	DEG_G2	DEG_G3	Total		SSS-baySeq	nonDEG	DEG_G1	DEG_G2	DEG_G3	Total		SSS-baySeq	nonDEG	DEG_G1	DEG_G2	DEG_G3	Total		SSS-baySeq	nonDEG	DEG_G1	DEG_G2	DEG_G3	Total		SSS-baySeq	nonDEG	DEG_G1	DEG_G2	DEG_G3	Total		SSS-baySeq	nonDEG	DEG_G1	DEG_G2	DEG_G3	Total		SSS-baySeq	nonDEG	DEG_G1	DEG_G2	DEG_G3	Total
nonDEG	7443.78	395.12	399.14	394.08	8632.12		nonDEG	7443.23	572.15	359.95	247.89	8623.22		nonDEG	7442.56	570.44	465.63	128.98	8607.61		nonDEG	7442.83	671.11	246.94	247.15	8608.03		nonDEG	7442.81	672.33	357.32	129.63	8602.09		nonDEG	7441.09	768.91	246.16	128.96	8585.12		nonDEG	7440.95	862.87	127.48	129.36	8560.66
DEG_G1	19.11	431.67	3.08	3.42	457.28		DEG_G1	25.44	670.52	4.07	2.88	702.91		DEG_G1	25.87	672.25	5.19	1.61	704.92		DEG_G1	30.41	820.96	3.35	3.55	858.27		DEG_G1	29.81	820.1	5.05	1.68	856.64		DEG_G1	34.93	973.65	3.74	2.12	1014.44		DEG_G1	39.24	1130.58	2.68	2.7	1175.2
DEG_G2	18.98	3.24	427.69	3.37	453.28		DEG_G2	17.99	4.27	383.77	1.81	407.84		DEG_G2	22.27	5.12	527.22	1.35	555.96		DEG_G2	13.61	3.76	248.3	1.57	267.24		DEG_G2	17.97	4.88	385.86	1.08	409.79		DEG_G2	14.15	4.46	249.06	0.82	268.49		DEG_G2	9.87	3.1	119.52	0.46	132.95
DEG_G3	19.13	2.97	3.09	432.13	457.32		DEG_G3	13.34	3.06	2.21	247.42	266.03		DEG_G3	9.3	2.19	1.96	118.06	131.51		DEG_G3	13.15	4.17	1.41	247.73	266.46		DEG_G3	9.41	2.69	1.77	117.61	131.48		DEG_G3	9.83	2.98	1.04	118.1	131.95		DEG_G3	9.94	3.45	0.32	117.48	131.19
E-baySeq	nonDEG	DEG_G1	DEG_G2	DEG_G3	Total		E-baySeq	nonDEG	DEG_G1	DEG_G2	DEG_G3	Total		E-baySeq	nonDEG	DEG_G1	DEG_G2	DEG_G3	Total		E-baySeq	nonDEG	DEG_G1	DEG_G2	DEG_G3	Total		E-baySeq	nonDEG	DEG_G1	DEG_G2	DEG_G3	Total		E-baySeq	nonDEG	DEG_G1	DEG_G2	DEG_G3	Total		E-baySeq	nonDEG	DEG_G1	DEG_G2	DEG_G3	Total
nonDEG	7443.65	394.12	398.18	393.83	8629.78		nonDEG	7443.76	589.93	358.99	243.02	8635.7		nonDEG	7444.49	588.42	473.07	125.17	8631.15		nonDEG	7442.94	708.49	242.4	242.9	8636.73		nonDEG	7443.64	710.63	356.75	125.19	8636.21		nonDEG	7440.14	834.99	241.69	125.45	8642.27		nonDEG	7437.61	965.67	122.96	125.24	8651.48
DEG_G1	19.19	432.46	3.17	3.26	458.08		DEG_G1	24.93	652.88	4.74	3.05	685.6		DEG_G1	24.87	653.6	6.67	1.54	686.68		DEG_G1	30.49	783.52	4.05	4.34	822.4		DEG_G1	29.66	781.49	6.74	1.92	819.81		DEG_G1	35.71	907.39	5.4	2.74	951.24		DEG_G1	42.61	1027.38	3.79	3.69	1077.47
DEG_G2	18.88	3.28	428.48	3.39	454.03		DEG_G2	17.68	4.47	384.57	1.66	408.38		DEG_G2	20.88	6	518.84	1.19	546.91		DEG_G2	13.58	3.88	252.45	1.25	271.16		DEG_G2	17.01	5.62	385.26	0.7	408.59		DEG_G2	13.83	4.71	252.33	0.52	271.39		DEG_G2	9.93	3.41	123.04	0.25	136.63
DEG_G3	19.28	3.14	3.17	432.52	458.11		DEG_G3	13.63	2.72	1.7	252.27	270.32		DEG_G3	9.76	1.98	1.42	122.1	135.26		DEG_G3	12.99	4.11	1.1	251.51	269.71		DEG_G3	9.69	2.26	1.25	122.19	135.39		DEG_G3	10.32	2.91	0.58	121.29	135.1		DEG_G3	9.85	3.54	0.21	120.82	134.42
M-baySeq	nonDEG	DEG_G1	DEG_G2	DEG_G3	Total		M-baySeq	nonDEG	DEG_G1	DEG_G2	DEG_G3	Total		M-baySeq	nonDEG	DEG_G1	DEG_G2	DEG_G3	Total		M-baySeq	nonDEG	DEG_G1	DEG_G2	DEG_G3	Total		M-baySeq	nonDEG	DEG_G1	DEG_G2	DEG_G3	Total		M-baySeq	nonDEG	DEG_G1	DEG_G2	DEG_G3	Total		M-baySeq	nonDEG	DEG_G1	DEG_G2	DEG_G3	Total
nonDEG	7444.26	394.87	398.87	394.08	8632.08		nonDEG	7444.79	583	359.55	245.5	8632.84		nonDEG	7445.09	582.71	470.91	127.07	8625.78		nonDEG	7444.03	693.55	244.41	244.49	8626.48		nonDEG	7444.77	694.29	357.66	127.27	8623.99		nonDEG	7442.79	808.39	243.48	126.71	8621.37		nonDEG	7442.16	925.64	124.99	126.86	8619.65
DEG_G1	18.87	431.85	3.07	3.28	457.07		DEG_G1	24.61	659.91	4.54	2.87	691.93		DEG_G1	24.81	659.69	5.92	1.52	691.94		DEG_G1	29.54	798.74	3.96	3.77	836.01		DEG_G1	28.53	797.99	5.88	1.78	834.18		DEG_G1	33.45	934.06	4.75	2.5	974.76		DEG_G1	38.45	1067.53	3.13	3.31	1112.42
DEG_G2	18.88	3.27	427.92	3.39	453.46		DEG_G2	17.66	4.2	384.05	1.81	407.72		DEG_G2	20.96	5.69	521.68	1.23	549.56		DEG_G2	13.53	3.86	250.45	1.4	269.24		DEG_G2	17.32	5.26	385	0.98	408.56		DEG_G2	13.93	4.6	251.01	0.63	270.17		DEG_G2	9.65	3.39	121.59	0.35	134.98
DEG_G3	18.99	3.01	3.14	432.25	457.39		DEG_G3	12.94	2.89	1.86	249.82	267.51		DEG_G3	9.14	1.91	1.49	120.18	132.72		DEG_G3	12.9	3.85	1.18	250.34	268.27		DEG_G3	9.38	2.46	1.46	119.97	133.27		DEG_G3	9.83	2.95	0.76	120.16	133.7		DEG_G3	9.74	3.44	0.29	119.48	132.95
EEE-EBSeq	nonDEG	DEG_G1	DEG_G2	DEG_G3	Total		EEE-EBSeq	nonDEG	DEG_G1	DEG_G2	DEG_G3	Total		EEE-EBSeq	nonDEG	DEG_G1	DEG_G2	DEG_G3	Total		EEE-EBSeq	nonDEG	DEG_G1	DEG_G2	DEG_G3	Total		EEE-EBSeq	nonDEG	DEG_G1	DEG_G2	DEG_G3	Total		EEE-EBSeq	nonDEG	DEG_G1	DEG_G2	DEG_G3	Total		EEE-EBSeq	nonDEG	DEG_G1	DEG_G2	DEG_G3	Total
nonDEG	6880.28	251.17	253.55	250.92	7635.92		nonDEG	6885.36	372.35	228.46	155.24	7641.41		nonDEG	6886.22	374.52	298.02	79.64	7638.4		nonDEG	6889.06	443.29	153.22	156.1	7641.67		nonDEG	6889.43	445.46	226.15	80.14	7641.18		nonDEG	6893.92	515.24	154.27	81.12	7644.55		nonDEG	6899.38	583.47	78.53	80.03	7641.41
DEG_G1	207.58	542.53	20.02	20.36	790.49		DEG_G1	247.18	829.18	23.05	16.49	1115.9		DEG_G1	249.68	828.08	30.25	8.73	1116.74		DEG_G1	269.79	1005.33	17.74	17.72	1310.58		DEG_G1	270.31	1003.89	24.93	8.82	1307.95		DEG_G1	290.93	1181.22	19.1	10.17	1501.42		DEG_G1	316.19	1362.8	11.41	11.63	1702.03
DEG_G2	206.78	19.58	539.6	20.29	786.25		DEG_G2	199.31	25.94	484.13	12.43	721.81		DEG_G2	223.86	30.19	656.71	7.32	918.08		DEG_G2	172.73	25.77	318.66	10.12	527.28		DEG_G2	200.72	31.03	486.73	6.46	724.94		DEG_G2	173.6	30.07	318.06	5.26	526.99		DEG_G2	141.58	27.55	156.09	4.53	329.75
DEG_G3	206.34	19.72	19.83	541.43	787.32		DEG_G3	168.15	22.53	14.36	315.84	520.88		DEG_G3	140.23	17.21	15.02	154.31	326.77		DEG_G3	168.42	25.6	10.38	316.06	520.46		DEG_G3	139.54	19.61	12.19	154.57	325.91		DEG_G3	141.55	23.47	8.57	153.45	327.04		DEG_G3	142.85	26.18	3.97	153.81	326.81
SSS-EBSeq	nonDEG	DEG_G1	DEG_G2	DEG_G3	Total		SSS-EBSeq	nonDEG	DEG_G1	DEG_G2	DEG_G3	Total		SSS-EBSeq	nonDEG	DEG_G1	DEG_G2	DEG_G3	Total		SSS-EBSeq	nonDEG	DEG_G1	DEG_G2	DEG_G3	Total		SSS-EBSeq	nonDEG	DEG_G1	DEG_G2	DEG_G3	Total		SSS-EBSeq	nonDEG	DEG_G1	DEG_G2	DEG_G3	Total		SSS-EBSeq	nonDEG	DEG_G1	DEG_G2	DEG_G3	Total
nonDEG	6880.24	251.22	253.42	250.81	7635.69		nonDEG	6885.52	371.78	228.71	155.42	7641.43		nonDEG	6886.67	373.73	297.52	80.05	7637.97		nonDEG	6889.52	441.83	153.64	156.43	7641.42		nonDEG	6889.66	444.14	226.15	80.33	7640.28		nonDEG	6894.51	512.6	154.37	81.36	7642.84		nonDEG	6900.48	579.19	78.78	80.19	7638.64
DEG_G1	207.45	542.48	20.01	20.31	790.25		DEG_G1	247.16	829.71	23.05	16.43	1116.35		DEG_G1	249.38	828.92	29.84	8.73	1116.87		DEG_G1	269.19	1007	17.54	17.55	1311.28		DEG_G1	269.47	1005.25	24.52	8.74	1307.98		DEG_G1	290.01	1183.9	18.76	10.02	1502.69		DEG_G1	315.22	1366.97	11.22	11.52	1704.93
DEG_G2	207.09	19.57	539.7	20.29	786.65		DEG_G2	199.31	25.94	483.81	12.52	721.58		DEG_G2	224.03	29.92	657.43	7.32	918.7		DEG_G2	172.94	25.67	318.4	10.18	527.19		DEG_G2	201.03	30.75	486.94	6.46	725.18		DEG_G2	174.02	29.96	318.07	5.37	527.42		DEG_G2	141.26	27.7	155.9	4.64	329.5
DEG_G3	206.2	19.73	19.87	541.59	787.39		DEG_G3	168.01	22.57	14.43	315.63	520.64		DEG_G3	139.91	17.43	15.21	153.9	326.45		DEG_G3	168.35	25.49	10.42	315.84	520.1		DEG_G3	139.84	19.85	12.39	154.46	326.54		DEG_G3	141.46	23.54	8.8	153.25	327.05		DEG_G3	143.04	26.14	4.1	153.65	326.93
S-EBSeq	nonDEG	DEG_G1	DEG_G2	DEG_G3	Total		S-EBSeq	nonDEG	DEG_G1	DEG_G2	DEG_G3	Total		S-EBSeq	nonDEG	DEG_G1	DEG_G2	DEG_G3	Total		S-EBSeq	nonDEG	DEG_G1	DEG_G2	DEG_G3	Total		S-EBSeq	nonDEG	DEG_G1	DEG_G2	DEG_G3	Total		S-EBSeq	nonDEG	DEG_G1	DEG_G2	DEG_G3	Total		S-EBSeq	nonDEG	DEG_G1	DEG_G2	DEG_G3	Total
nonDEG	6880.95	251.22	253.37	251.17	7636.71		nonDEG	6864.63	387.46	225.99	150.12	7628.2		nonDEG	6851.47	388.38	300.85	75.17	7615.87		nonDEG	6834.75	471.63	147.46	150.13	7603.97		nonDEG	6829.41	472.73	222.21	75.7	7600.05		nonDEG	6780.65	561.87	146.71	75.52	7564.75		nonDEG	6699.46	650.36	72.48	74.04	7496.34
DEG_G1	207.29	542.55	19.96	20.38	790.18		DEG_G1	264.63	812.96	27.27	17.91	1122.77		DEG_G1	264.92	810.73	36.93	8.84	1121.42		DEG_G1	320.37	975.74	21.77	21.66	1339.54		DEG_G1	318.3	973.85	32.38	9.96	1334.49		DEG_G1	394.58	1133.18	26.55	13.3	1567.61		DEG_G1	501.05	1295.24	16.83	16.41	1829.53
DEG_G2	206.68	19.47	539.75	20.24	786.14		DEG_G2	196.85	27.67	484.37	11.15	720.04		DEG_G2	221.44	35.46	649.36	6.76	913.02		DEG_G2	174.55	26.38	322.24	8.23	531.4		DEG_G2	194.53	34.67	485.66	5.1	719.96		DEG_G2	169.05	32.06	320.56	3.96	525.63		DEG_G2	148.46	27.84	157.93	3.07	337.3
DEG_G3	206.06	19.76	19.92	541.21	786.95		DEG_G3	173.89	21.91	12.37	320.82	528.99		DEG_G3	162.16	15.43	12.86	159.23	349.68		DEG_G3	170.33	26.24	8.53	319.98	525.08		DEG_G3	157.76	18.74	9.75	159.23	345.48		DEG_G3	155.72	22.89	6.18	157.22	342.01		DEG_G3	151.03	26.56	2.76	156.48	336.83
M-EBSeq	nonDEG	DEG_G1	DEG_G2	DEG_G3	Total		M-EBSeq	nonDEG	DEG_G1	DEG_G2	DEG_G3	Total		M-EBSeq	nonDEG	DEG_G1	DEG_G2	DEG_G3	Total		M-EBSeq	nonDEG	DEG_G1	DEG_G2	DEG_G3	Total		M-EBSeq	nonDEG	DEG_G1	DEG_G2	DEG_G3	Total		M-EBSeq	nonDEG	DEG_G1	DEG_G2	DEG_G3	Total		M-EBSeq	nonDEG	DEG_G1	DEG_G2	DEG_G3	Total
nonDEG	6885.94	251.07	253.83	251.6	7642.44		nonDEG	6886.32	378.99	228.84	153.46	7647.61		nonDEG	6885.91	381.17	300.5	77.83	7645.41		nonDEG	6882.29	457.28	151.22	154.17	7644.96		nonDEG	6881.47	458.57	225.73	78.22	7643.99		nonDEG	6869.21	540.62	151.23	78.67	7639.73		nonDEG	6846.21	623.23	76.05	77.55	7623.04
DEG_G1	205.43	542.97	19.93	20.17	788.5		DEG_G1	249.38	822.22	24.44	16.9	1112.94		DEG_G1	251.02	820.48	32.59	8.69	1112.78		DEG_G1	280.26	990.93	19.18	19.36	1309.73		DEG_G1	280.26	989.43	27.57	9.34	1306.6		DEG_G1	318.12	1155.33	22.43	11.54	1507.42		DEG_G1	368.57	1322.78	13.62	13.87	1718.84
DEG_G2	205.18	19.36	539.49	20.23	784.26		DEG_G2	196.64	26.75	483.3	11.79	718.48		DEG_G2	220.69	32.23	653.01	7.23	913.16		DEG_G2	170.85	26.06	320.21	9.08	526.2		DEG_G2	197.24	33.02	485.95	5.78	721.99		DEG_G2	169.75	31.11	319.29	4.52	524.67		DEG_G2	141.89	27.68	157.21	3.67	330.45
DEG_G3	204.45	19.6	19.75	541	784.8		DEG_G3	167.66	22.04	13.42	317.85	520.97		DEG_G3	142.38	16.12	13.9	156.25	328.65		DEG_G3	166.6	25.73	9.39	317.39	519.11		DEG_G3	141.03	18.98	10.75	156.66	327.42		DEG_G3	142.92	22.94	7.05	155.27	328.18		DEG_G3	143.33	26.31	3.12	154.91	327.67

## Sheet: Sheet5
	actual FDR values
	PG1	1/3	0.5	0.5	0.6	0.6	0.7	0.8
	PG2	1/3	0.3	0.4	0.2	0.3	0.2	0.1
	PG3	1/3	0.2	0.1	0.2	0.1	0.1	0.1
	PDEG = 0.05
	EEE-baySeq	0.0930035	0.0902545	0.0899977	0.0928647	0.0895035	0.0918431	0.0894787
	SSS-baySeq	0.0918769	0.0890911	0.0895269	0.0930788	0.091959	0.0916448	0.0892494
	E-baySeq	0.092567	0.0902386	0.0908764	0.0938048	0.091753	0.0924045	0.0894331
	M-baySeq	0.0917538	0.0890219	0.0896816	0.0922677	0.0907694	0.0902045	0.0905962
	EEE-EBSeq	0.568149	0.568216	0.567607	0.567161	0.565556	0.565937	0.564676
	SSS-EBSeq	0.567946	0.568648	0.567755	0.567086	0.565691	0.566074	0.564495
	S-EBSeq	0.569534	0.570607	0.569995	0.569869	0.568542	0.569776	0.569834
	M-EBSeq	0.565428	0.566394	0.565019	0.565487	0.564265	0.564404	0.562968
	PDEG = 0.25
	EEE-baySeq	0.0422704	0.0411066	0.0406095	0.040948	0.0406871	0.0411502	0.0407062
	SSS-baySeq	0.0418088	0.0412106	0.0412464	0.0410354	0.0408728	0.0415928	0.0410004
	E-baySeq	0.0418261	0.0411898	0.0405419	0.0418297	0.0412747	0.0440372	0.0462256
	M-baySeq	0.0414499	0.040344	0.0399496	0.0407119	0.040085	0.0414562	0.0418582
	EEE-EBSeq	0.262485	0.260533	0.259826	0.258992	0.2588	0.257232	0.254548
	SSS-EBSeq	0.262478	0.260465	0.25959	0.258768	0.258603	0.256797	0.253785
	S-EBSeq	0.262288	0.267813	0.271947	0.277565	0.279358	0.295309	0.319609
	M-EBSeq	0.26082	0.260801	0.260733	0.262213	0.262472	0.267163	0.274923

## Sheet: Sheet6
	Sensitivities
	PG1	1/3	0.5	0.5	0.6	0.6	0.7	0.8
	PG2	1/3	0.3	0.4	0.2	0.3	0.2	0.1
	PG3	1/3	0.2	0.1	0.2	0.1	0.1	0.1
	PDEG = 0.05
	EEE-baySeq	0.443493	0.44804	0.45032	0.4504	0.4511	0.45616	0.46208
	SSS-baySeq	0.443174	0.44732	0.44946	0.44852	0.45032	0.45688	0.4631
	E-baySeq	0.444132	0.44812	0.44844	0.44778	0.44802	0.45268	0.45676
	M-baySeq	0.443114	0.44814	0.4485	0.44866	0.44866	0.45406	0.4582
	EEE-EBSeq	0.619002	0.6218	0.62232	0.62332	0.62306	0.62428	0.62738
	SSS-EBSeq	0.619142	0.62128	0.62228	0.62326	0.6231	0.62398	0.62756
	S-EBSeq	0.61996	0.62166	0.62252	0.62248	0.6222	0.6223	0.62364
	M-EBSeq	0.618902	0.62046	0.6216	0.62198	0.62148	0.62244	0.62484
	PDEG = 0.25
	EEE-baySeq	0.525122	0.527536	0.531872	0.532884	0.536304	0.541532	0.550936
	SSS-baySeq	0.524474	0.528004	0.53398	0.53392	0.536288	0.542388	0.552116
	E-baySeq	0.525358	0.523224	0.525336	0.522484	0.522972	0.519148	0.514452
	M-baySeq	0.524682	0.52478	0.527724	0.52702	0.528312	0.528568	0.529004
	EEE-EBSeq	0.697595	0.697556	0.699096	0.698944	0.699252	0.699716	0.703168
	SSS-EBSeq	0.697663	0.697612	0.69944	0.699216	0.699716	0.700644	0.704712
	S-EBSeq	0.697555	0.694508	0.694204	0.692284	0.6917	0.68632	0.68122
	M-EBSeq	0.697279	0.695484	0.6962	0.694932	0.694992	0.691792	0.689268

## Sheet: Sheet7
	Specificities
	PG1	1/3	0.5	0.5	0.6	0.6	0.7	0.8
	PG2	1/3	0.3	0.4	0.2	0.3	0.2	0.1
	PG3	1/3	0.2	0.1	0.2	0.1	0.1	0.1
	PDEG = 0.05
	EEE-baySeq	0.997592	0.997657	0.997652	0.997568	0.997665	0.997566	0.997604
	SSS-baySeq	0.997629	0.997694	0.997668	0.997569	0.997596	0.997569	0.997604
	E-baySeq	0.997603	0.997659	0.99764	0.997555	0.997619	0.997572	0.997633
	M-baySeq	0.997631	0.997693	0.997673	0.997595	0.99764	0.997625	0.997591
	EEE-EBSeq	0.957019	0.956908	0.956992	0.956998	0.957286	0.957153	0.957163
	SSS-EBSeq	0.957042	0.956867	0.95696	0.95702	0.957252	0.957138	0.957186
	S-EBSeq	0.95671	0.956492	0.95656	0.956569	0.956835	0.956598	0.956509
	M-EBSeq	0.957469	0.957288	0.957448	0.957349	0.957594	0.957513	0.957593
	PDEG = 0.25
	EEE-baySeq	0.992273	0.992455	0.992493	0.992409	0.992412	0.992247	0.992201
	SSS-baySeq	0.992372	0.992431	0.992341	0.992377	0.992375	0.992145	0.992127
	E-baySeq	0.992354	0.992501	0.992599	0.992392	0.992485	0.992019	0.991681
	M-baySeq	0.992436	0.992639	0.992679	0.992537	0.992636	0.992372	0.992288
	EEE-EBSeq	0.917272	0.918073	0.918192	0.918572	0.918615	0.919217	0.919948
	SSS-EBSeq	0.917278	0.918088	0.918241	0.918619	0.918649	0.919289	0.920087
	S-EBSeq	0.917371	0.915303	0.913559	0.911332	0.910607	0.904107	0.893291
	M-EBSeq	0.918003	0.918176	0.918121	0.917639	0.917529	0.915895	0.912828
