# Supplementary material for: Accurate Classification of Differential Expression Patterns in a Bayesian Framework With Robust Normalization for Multi-Group RNA-Seq Count Data
Source: Bioinform Biol Insights. 2019 Jul 8;13:1177932219860817. doi: 10.1177/1177932219860817 (PMC6614939; doi:10.1177/1177932219860817)
Supplement: Additional2_xyz1922267354467 – Supplemental material for Accurate Classification of Differential Expression Patterns in a Bayesian Framework With Robust Normalization for Multi-Group RNA-Seq Count Data [file Additional2_xyz1922267354467.xlsx]

## Sheet: Sheet1
	AUC values
	PG1	1/3	0.5	0.5	0.6	0.6	0.7	0.8
	PG2	1/3	0.3	0.4	0.2	0.3	0.2	0.1
	PG3	1/3	0.2	0.1	0.2	0.1	0.1	0.1
	PDEG = 0.05
	EEE-baySeq	96.3317	96.3471	96.3788	96.4853	96.4133	96.4655	96.5236
	SSS-baySeq	96.3437	96.376	96.393	96.4492	96.4227	96.4913	96.5537
	E-baySeq	96.3277	96.3496	96.3525	96.4276	96.337	96.4105	96.4196
	M-baySeq	96.3172	96.3674	96.3587	96.4449	96.3984	96.4444	96.5011
	EEE-EBSeq	96.8215	96.8922	96.9151	96.997	96.9527	97.016	96.9991
	SSS-EBSeq	96.8236	96.8953	96.9139	96.9973	96.9558	97.0213	97.0025
	S-EBSeq	96.8286	96.8935	96.9009	96.975	96.9273	96.9643	96.9154
	M-EBSeq	96.8233	96.8861	96.9017	96.9994	96.9518	97.0055	96.9743
	PDEG = 0.25
	EEE-baySeq	96.4223	96.4638	96.4945	96.5132	96.5572	96.611	96.6951
	SSS-baySeq	96.4075	96.4699	96.4897	96.5156	96.5492	96.6472	96.7152
	E-baySeq	96.4087	96.306	96.27	96.0875	96.0817	95.6479	94.73
	M-baySeq	96.419	96.4261	96.4292	96.4202	96.4359	96.3893	96.3071
	EEE-EBSeq	96.8597	96.8885	96.9215	96.8828	96.9433	96.9788	97.0171
	SSS-EBSeq	96.8597	96.8902	96.9265	96.8832	96.9471	96.986	97.0298
	S-EBSeq	96.8602	96.7028	96.6156	96.3778	96.3823	95.8468	94.8542
	M-EBSeq	96.8598	96.8562	96.8826	96.7958	96.8435	96.7984	96.6903

## Sheet: Sheet2
	Accuracies
	PG1	1/3	0.5	0.5	0.6	0.6	0.7	0.8
	PG2	1/3	0.3	0.4	0.2	0.3	0.2	0.1
	PG3	1/3	0.2	0.1	0.2	0.1	0.1	0.1
	PDEG = 0.05
	EEE-baySeq	98.2711	98.2851	98.2913	98.3074	98.309	98.3217	98.3516
	SSS-baySeq	98.2624	98.2957	98.2928	98.3054	98.3083	98.3172	98.3507
	E-baySeq	98.2647	98.2817	98.2861	98.2998	98.2941	98.3006	98.3284
	M-baySeq	98.2714	98.2881	98.2857	98.3046	98.3013	98.3198	98.343
	EEE-EBSeq	96.9422	97.0034	96.998	96.9939	96.9863	97.0371	97.043
	SSS-EBSeq	96.9425	97.0017	96.9992	96.9959	96.9871	97.0355	97.0452
	S-EBSeq	96.9037	96.9592	96.9507	96.9432	96.9305	96.9664	96.9571
	M-EBSeq	96.9529	97.0174	97.0114	97.002	96.9978	97.0402	97.0526
	PDEG = 0.25
	EEE-baySeq	92.9687	93.0533	93.1595	93.1432	93.2306	93.3568	93.5733
	SSS-baySeq	92.9592	93.043	93.1663	93.1516	93.2288	93.3754	93.5881
	E-baySeq	92.9689	92.9267	92.9639	92.8189	92.8465	92.5778	91.9172
	M-baySeq	92.9725	93.014	93.1057	93.0533	93.1263	93.153	93.2132
	EEE-EBSeq	92.1685	92.2688	92.41	92.3985	92.515	92.5858	92.7698
	SSS-EBSeq	92.1667	92.2691	92.4137	92.3996	92.517	92.5975	92.7761
	S-EBSeq	92.1707	91.8151	91.6433	91.1614	91.0931	89.7767	87.4493
	M-EBSeq	92.1927	92.2319	92.3404	92.2796	92.3595	92.2652	92.1554

## Sheet: Sheet3
	Computation times (in seconds)
	PG1	1/3	0.5	0.5	0.6	0.6	0.7	0.8
	PG2	1/3	0.3	0.4	0.2	0.3	0.2	0.1
	PG3	1/3	0.2	0.1	0.2	0.1	0.1	0.1
	PDEG = 0.05
	EEE-baySeq	1388.38	1387.13	1387.39	1389.14	1386.7	1392.49	1392.07
	SSS-baySeq	1419.68	1414.81	1440.28	1423.09	1422.01	1426.42	1439.78
	E-baySeq	1363.52	1363.07	1369.1	1366.57	1362.03	1366.58	1372.04
	M-baySeq	1387.65	1360.64	1369.83	1363.85	1360.47	1366.71	1360.96
	EEE-EBSeq	430.726	422.627	461.227	424.162	454.19	455.595	446.439
	SSS-EBSeq	470.303	443.028	513.086	461.145	486.658	488.755	499.414
	S-EBSeq	414.889	395.114	440.029	398.035	425.599	443.601	424.139
	M-EBSeq	413.026	377.951	437.464	396.311	410.796	410.976	431.24
	PDEG = 0.25
	EEE-baySeq	1411.76	1389.11	1401.37	1393.17	1388.05	1387.01	1385.99
	SSS-baySeq	1427.73	1404.98	1432.93	1411.17	1405.65	1408.2	1403.36
	E-baySeq	1385.59	1364.84	1377.28	1370.23	1366.16	1365.33	1364.65
	M-baySeq	1372.1	1380.55	1437.4	1360.18	1387.55	1329.91	1333.77
	EEE-EBSeq	337.877	362.354	400.674	402.549	359.812	388.703	424.433
	SSS-EBSeq	361.755	380.354	424.209	428.659	384.666	406.066	440.631
	S-EBSeq	314.304	337.951	352.258	345.736	342.241	356.317	350.289
	M-EBSeq	314.944	330.339	391.458	382.363	339.903	343.852	382.952

## Sheet: Sheet4
Confusion matrices under PDEG = 0.05
		PG1 = 1/3	PG2 = 1/3	PG3 = 1/3					PG1 = 0.5	PG2 = 0.3	PG3 = 0.2					PG1 = 0.5	PG2 = 0.4	PG3 = 0.1					PG1 = 0.6	PG2 = 0.2	PG3 = 0.2					PG1 = 0.6	PG2 = 0.3	PG3 = 0.1					PG1 = 0.7	PG2 = 0.2	PG3 = 0.1					PG1 = 0.8	PG2 = 0.1	PG3 = 0.1
EEE-baySeq	nonDEG	DEG_G1	DEG_G2	DEG_G3	Total		EEE-baySeq	nonDEG	DEG_G1	DEG_G2	DEG_G3	Total		EEE-baySeq	nonDEG	DEG_G1	DEG_G2	DEG_G3	Total		EEE-baySeq	nonDEG	DEG_G1	DEG_G2	DEG_G3	Total		EEE-baySeq	nonDEG	DEG_G1	DEG_G2	DEG_G3	Total		EEE-baySeq	nonDEG	DEG_G1	DEG_G2	DEG_G3	Total		EEE-baySeq	nonDEG	DEG_G1	DEG_G2	DEG_G3	Total
nonDEG	9482.5	50.88	52.03	51.57	9636.98		nonDEG	9483.24	74.31	46.95	31.72	9636.22		nonDEG	9482.72	73.63	61.74	16.57	9634.66		nonDEG	9483.33	87.18	32.03	31.6	9634.14		nonDEG	9483.81	87.06	47.79	16.33	9634.99		nonDEG	9483.54	100.72	32.78	16.58	9633.62		nonDEG	9482.75	113.35	16.63	16.41	9629.14
DEG_G1	5.78	115.49	0.34	0.3	121.91		DEG_G1	7.58	175.03	0.34	0.31	183.26		DEG_G1	7.76	175.64	0.46	0.15	184.01		DEG_G1	8.16	212.06	0.31	0.4	220.93		DEG_G1	8.04	212.21	0.46	0.22	220.93		DEG_G1	9.63	248.56	0.29	0.15	258.63		DEG_G1	10.93	286.05	0.26	0.22	297.46
DEG_G2	5.35	0.34	114.31	0.32	120.32		DEG_G2	5.53	0.39	102.49	0.22	108.63		DEG_G2	6.35	0.51	137.63	0.14	144.63		DEG_G2	4.31	0.42	67.48	0.13	72.34		DEG_G2	5.23	0.41	101.55	0.12	107.31		DEG_G2	4.17	0.38	66.87	0.07	71.49		DEG_G2	3.25	0.32	33.05	0.06	36.68
DEG_G3	5.37	0.29	0.32	114.81	120.79		DEG_G3	3.65	0.27	0.22	67.75	71.89		DEG_G3	3.17	0.22	0.17	33.14	36.7		DEG_G3	4.2	0.34	0.18	67.87	72.59		DEG_G3	2.92	0.32	0.2	33.33	36.77		DEG_G3	2.66	0.34	0.06	33.2	36.26		DEG_G3	3.07	0.28	0.06	33.31	36.72
SSS-baySeq	nonDEG	DEG_G1	DEG_G2	DEG_G3	Total		SSS-baySeq	nonDEG	DEG_G1	DEG_G2	DEG_G3	Total		SSS-baySeq	nonDEG	DEG_G1	DEG_G2	DEG_G3	Total		SSS-baySeq	nonDEG	DEG_G1	DEG_G2	DEG_G3	Total		SSS-baySeq	nonDEG	DEG_G1	DEG_G2	DEG_G3	Total		SSS-baySeq	nonDEG	DEG_G1	DEG_G2	DEG_G3	Total		SSS-baySeq	nonDEG	DEG_G1	DEG_G2	DEG_G3	Total
nonDEG	9482.08	50.97	52.26	51.67	9636.98		nonDEG	9483.76	74	46.81	31.68	9636.25		nonDEG	9483.16	73.8	61.77	16.6	9635.33		nonDEG	9482.95	87.17	32.13	31.49	9633.74		nonDEG	9483.73	87.07	47.69	16.38	9634.87		nonDEG	9483.36	100.83	32.82	16.57	9633.58		nonDEG	9482.55	113.16	16.71	16.4	9628.82
DEG_G1	5.79	115.36	0.33	0.29	121.77		DEG_G1	7.31	175.29	0.29	0.32	183.21		DEG_G1	7.58	175.45	0.52	0.17	183.72		DEG_G1	8.62	212.12	0.26	0.36	221.36		DEG_G1	8.13	212.13	0.46	0.22	220.94		DEG_G1	9.62	248.4	0.33	0.15	258.5		DEG_G1	10.96	286.18	0.23	0.23	297.6
DEG_G2	5.51	0.36	114.1	0.34	120.31		DEG_G2	5.24	0.4	102.7	0.18	108.52		DEG_G2	6.35	0.52	137.55	0.11	144.53		DEG_G2	4.2	0.36	67.46	0.14	72.16		DEG_G2	5.1	0.4	101.67	0.1	107.27		DEG_G2	4.35	0.47	66.75	0.07	71.64		DEG_G2	3.43	0.4	33.01	0.04	36.88
DEG_G3	5.62	0.31	0.31	114.7	120.94		DEG_G3	3.69	0.31	0.2	67.82	72.02		DEG_G3	2.91	0.23	0.16	33.12	36.42		DEG_G3	4.23	0.35	0.15	68.01	72.74		DEG_G3	3.04	0.4	0.18	33.3	36.92		DEG_G3	2.67	0.3	0.1	33.21	36.28		DEG_G3	3.06	0.26	0.05	33.33	36.7
E-baySeq	nonDEG	DEG_G1	DEG_G2	DEG_G3	Total		E-baySeq	nonDEG	DEG_G1	DEG_G2	DEG_G3	Total		E-baySeq	nonDEG	DEG_G1	DEG_G2	DEG_G3	Total		E-baySeq	nonDEG	DEG_G1	DEG_G2	DEG_G3	Total		E-baySeq	nonDEG	DEG_G1	DEG_G2	DEG_G3	Total		E-baySeq	nonDEG	DEG_G1	DEG_G2	DEG_G3	Total		E-baySeq	nonDEG	DEG_G1	DEG_G2	DEG_G3	Total
nonDEG	9482.04	50.85	52.21	51.62	9636.72		nonDEG	9482.67	74.45	46.85	31.51	9635.48		nonDEG	9482.69	74.35	61.69	16.35	9635.08		nonDEG	9482.86	87.9	31.95	31.42	9634.13		nonDEG	9483.02	88.2	47.58	16.19	9634.99		nonDEG	9482.86	102.64	32.62	16.27	9634.39		nonDEG	9482.54	115.75	16.5	16.2	9630.99
DEG_G1	5.65	115.46	0.35	0.27	121.73		DEG_G1	7.9	174.89	0.35	0.3	183.44		DEG_G1	7.73	174.86	0.48	0.14	183.21		DEG_G1	8.64	211.44	0.31	0.35	220.74		DEG_G1	8.65	211.11	0.51	0.19	220.46		DEG_G1	9.91	246.66	0.3	0.17	257.04		DEG_G1	11.17	283.65	0.28	0.26	295.36
DEG_G2	5.78	0.34	114.18	0.32	120.62		DEG_G2	5.49	0.41	102.62	0.2	108.72		DEG_G2	6.53	0.53	137.66	0.11	144.83		DEG_G2	4.37	0.35	67.59	0.14	72.45		DEG_G2	5.17	0.4	101.76	0.1	107.43		DEG_G2	4.37	0.44	67.04	0.06	71.91		DEG_G2	3.24	0.31	33.15	0.04	36.74
DEG_G3	5.53	0.35	0.26	114.79	120.93		DEG_G3	3.94	0.25	0.18	67.99	72.36		DEG_G3	3.05	0.26	0.17	33.4	36.88		DEG_G3	4.13	0.31	0.15	68.09	72.68		DEG_G3	3.16	0.29	0.15	33.52	37.12		DEG_G3	2.86	0.26	0.04	33.5	36.66		DEG_G3	3.05	0.29	0.07	33.5	36.91
M-baySeq	nonDEG	DEG_G1	DEG_G2	DEG_G3	Total		M-baySeq	nonDEG	DEG_G1	DEG_G2	DEG_G3	Total		M-baySeq	nonDEG	DEG_G1	DEG_G2	DEG_G3	Total		M-baySeq	nonDEG	DEG_G1	DEG_G2	DEG_G3	Total		M-baySeq	nonDEG	DEG_G1	DEG_G2	DEG_G3	Total		M-baySeq	nonDEG	DEG_G1	DEG_G2	DEG_G3	Total		M-baySeq	nonDEG	DEG_G1	DEG_G2	DEG_G3	Total
nonDEG	9482.86	51.02	52.15	51.66	9637.69		nonDEG	9483.07	74.3	46.78	31.56	9635.71		nonDEG	9482.67	74.08	61.88	16.5	9635.13		nonDEG	9483.29	87.72	32.02	31.51	9634.54		nonDEG	9483.48	87.66	47.67	16.33	9635.14		nonDEG	9483.94	101.41	32.78	16.49	9634.62		nonDEG	9482.86	114.49	16.68	16.25	9630.28
DEG_G1	5.57	115.33	0.3	0.33	121.53		DEG_G1	7.5	175.03	0.32	0.29	183.14		DEG_G1	7.89	175.22	0.48	0.15	183.74		DEG_G1	8.11	211.6	0.28	0.34	220.33		DEG_G1	8.64	211.59	0.48	0.19	220.9		DEG_G1	9.39	247.9	0.32	0.15	257.76		DEG_G1	10.81	284.94	0.24	0.23	296.22
DEG_G2	5.24	0.33	114.25	0.31	120.13		DEG_G2	5.21	0.4	102.74	0.18	108.53		DEG_G2	6.43	0.5	137.47	0.14	144.54		DEG_G2	4.21	0.36	67.53	0.11	72.21		DEG_G2	4.99	0.43	101.69	0.11	107.22		DEG_G2	4.07	0.44	66.85	0.07	71.43		DEG_G2	3.16	0.3	33.03	0.05	36.54
DEG_G3	5.33	0.32	0.3	114.7	120.65		DEG_G3	4.22	0.27	0.16	67.97	72.62		DEG_G3	3.01	0.2	0.17	33.21	36.59		DEG_G3	4.39	0.32	0.17	68.04	72.92		DEG_G3	2.89	0.32	0.16	33.37	36.74		DEG_G3	2.6	0.25	0.05	33.29	36.19		DEG_G3	3.17	0.27	0.05	33.47	36.96
EEE-EBSeq	nonDEG	DEG_G1	DEG_G2	DEG_G3	Total		EEE-EBSeq	nonDEG	DEG_G1	DEG_G2	DEG_G3	Total		EEE-EBSeq	nonDEG	DEG_G1	DEG_G2	DEG_G3	Total		EEE-EBSeq	nonDEG	DEG_G1	DEG_G2	DEG_G3	Total		EEE-EBSeq	nonDEG	DEG_G1	DEG_G2	DEG_G3	Total		EEE-EBSeq	nonDEG	DEG_G1	DEG_G2	DEG_G3	Total		EEE-EBSeq	nonDEG	DEG_G1	DEG_G2	DEG_G3	Total
nonDEG	9286.91	26.37	27.93	27.17	9368.38		nonDEG	9291.25	38.51	24.95	16.11	9370.82		nonDEG	9290.89	38.72	32.38	8.69	9370.68		nonDEG	9288.68	45.45	16.95	16.08	9367.16		nonDEG	9289.07	45.74	25.04	9.14	9368.99		nonDEG	9291.55	51.91	17.19	8.16	9368.81		nonDEG	9290.66	59.53	8.69	8.43	9367.31
DEG_G1	71.89	136.64	1.86	1.92	212.31		DEG_G1	80.27	206.39	2.03	1.41	290.1		DEG_G1	80.24	206.12	2.45	0.81	289.62		DEG_G1	87.28	249.15	1.69	1.61	339.73		DEG_G1	87.85	248.91	2.41	0.73	339.9		DEG_G1	92.01	291.76	1.77	1.02	386.56		DEG_G1	98.79	333.96	1.21	1.01	434.97
DEG_G2	69.7	1.96	135.08	2.32	209.06		DEG_G2	67.23	2.75	121.45	1.23	192.66		DEG_G2	74.89	3.13	163.11	0.82	241.95		DEG_G2	62.15	2.69	80.24	0.99	146.07		DEG_G2	69.8	2.9	121.2	0.68	194.58		DEG_G2	62.84	3.42	80.05	0.47	146.78		DEG_G2	56.94	3.54	39.7	0.58	100.76
DEG_G3	70.5	2.03	2.13	135.59	210.25		DEG_G3	61.25	2.35	1.57	81.25	146.42		DEG_G3	53.98	2.03	2.06	39.68	97.75		DEG_G3	61.89	2.71	1.12	81.32	147.04		DEG_G3	53.28	2.45	1.35	39.45	96.53		DEG_G3	53.6	2.91	0.99	40.35	97.85		DEG_G3	53.61	2.97	0.4	39.98	96.96
SSS-EBSeq	nonDEG	DEG_G1	DEG_G2	DEG_G3	Total		SSS-EBSeq	nonDEG	DEG_G1	DEG_G2	DEG_G3	Total		SSS-EBSeq	nonDEG	DEG_G1	DEG_G2	DEG_G3	Total		SSS-EBSeq	nonDEG	DEG_G1	DEG_G2	DEG_G3	Total		SSS-EBSeq	nonDEG	DEG_G1	DEG_G2	DEG_G3	Total		SSS-EBSeq	nonDEG	DEG_G1	DEG_G2	DEG_G3	Total		SSS-EBSeq	nonDEG	DEG_G1	DEG_G2	DEG_G3	Total
nonDEG	9287.01	26.39	27.94	27.21	9368.55		nonDEG	9291.09	38.47	25.01	16.09	9370.66		nonDEG	9290.93	38.64	32.43	8.67	9370.67		nonDEG	9288.86	45.35	16.96	16.11	9367.28		nonDEG	9289.11	45.7	24.94	9.14	9368.89		nonDEG	9291.32	51.91	17.16	8.18	9368.57		nonDEG	9290.73	59.37	8.66	8.46	9367.22
DEG_G1	71.87	136.64	1.86	1.94	212.31		DEG_G1	80.32	206.41	2.05	1.39	290.17		DEG_G1	80.34	206.21	2.45	0.81	289.81		DEG_G1	87.22	249.23	1.67	1.62	339.74		DEG_G1	87.78	248.94	2.45	0.76	339.93		DEG_G1	92.18	291.79	1.75	1.01	386.73		DEG_G1	98.73	334.11	1.21	1.01	435.06
DEG_G2	69.69	1.94	135.07	2.32	209.02		DEG_G2	67.25	2.75	121.38	1.23	192.61		DEG_G2	74.84	3.11	163.08	0.82	241.85		DEG_G2	62.13	2.72	80.23	1	146.08		DEG_G2	69.75	2.89	121.25	0.69	194.58		DEG_G2	62.88	3.4	80.1	0.47	146.85		DEG_G2	56.84	3.53	39.73	0.58	100.68
DEG_G3	70.43	2.03	2.13	135.53	210.12		DEG_G3	61.34	2.37	1.56	81.29	146.56		DEG_G3	53.89	2.04	2.04	39.7	97.67		DEG_G3	61.79	2.7	1.14	81.27	146.9		DEG_G3	53.36	2.47	1.36	39.41	96.6		DEG_G3	53.62	2.9	0.99	40.34	97.85		DEG_G3	53.7	2.99	0.4	39.95	97.04
S-EBSeq	nonDEG	DEG_G1	DEG_G2	DEG_G3	Total		S-EBSeq	nonDEG	DEG_G1	DEG_G2	DEG_G3	Total		S-EBSeq	nonDEG	DEG_G1	DEG_G2	DEG_G3	Total		S-EBSeq	nonDEG	DEG_G1	DEG_G2	DEG_G3	Total		S-EBSeq	nonDEG	DEG_G1	DEG_G2	DEG_G3	Total		S-EBSeq	nonDEG	DEG_G1	DEG_G2	DEG_G3	Total		S-EBSeq	nonDEG	DEG_G1	DEG_G2	DEG_G3	Total
nonDEG	9282.24	26.09	27.54	26.92	9362.79		nonDEG	9286.4	38.63	24.58	15.74	9365.35		nonDEG	9286.01	38.9	32.23	8.38	9365.52		nonDEG	9283.4	46.06	16.48	15.66	9361.6		nonDEG	9283.69	46.26	24.63	8.79	9363.37		nonDEG	9285.09	53.11	16.73	7.88	9362.81		nonDEG	9283.49	61.37	8.35	8.15	9361.36
DEG_G1	73.81	136.89	1.89	1.96	214.55		DEG_G1	82.35	206.23	2.2	1.46	292.24		DEG_G1	81.97	205.83	2.67	0.83	291.3		DEG_G1	90.27	248.51	1.74	1.69	342.21		DEG_G1	90.4	248.23	2.73	0.76	342.12		DEG_G1	96.05	290.54	1.93	1.09	389.61		DEG_G1	104.04	332.03	1.31	1.1	438.48
DEG_G2	71.07	1.95	135.43	2.31	210.76		DEG_G2	68.7	2.77	121.7	1.21	194.38		DEG_G2	76.57	3.28	163.19	0.75	243.79		DEG_G2	63.27	2.71	80.72	0.96	147.66		DEG_G2	71.33	3.07	121.34	0.66	196.4		DEG_G2	63.98	3.45	80.43	0.45	148.31		DEG_G2	57.69	3.58	39.96	0.52	101.75
DEG_G3	71.88	2.07	2.14	135.81	211.9		DEG_G3	62.55	2.37	1.52	81.59	148.03		DEG_G3	55.45	1.99	1.91	40.04	99.39		DEG_G3	63.06	2.72	1.06	81.69	148.53		DEG_G3	54.58	2.44	1.3	39.79	98.11		DEG_G3	54.88	2.9	0.91	40.58	99.27		DEG_G3	54.78	3.02	0.38	40.23	98.41
M-EBSeq	nonDEG	DEG_G1	DEG_G2	DEG_G3	Total		M-EBSeq	nonDEG	DEG_G1	DEG_G2	DEG_G3	Total		M-EBSeq	nonDEG	DEG_G1	DEG_G2	DEG_G3	Total		M-EBSeq	nonDEG	DEG_G1	DEG_G2	DEG_G3	Total		M-EBSeq	nonDEG	DEG_G1	DEG_G2	DEG_G3	Total		M-EBSeq	nonDEG	DEG_G1	DEG_G2	DEG_G3	Total		M-EBSeq	nonDEG	DEG_G1	DEG_G2	DEG_G3	Total
nonDEG	9288.11	26.55	27.9	27.17	9369.73		nonDEG	9292.59	38.62	24.86	16.05	9372.12		nonDEG	9292.42	38.77	32.51	8.7	9372.4		nonDEG	9289.8	45.8	16.94	16.09	9368.63		nonDEG	9290.37	45.92	24.98	9.04	9370.31		nonDEG	9292.53	52.69	17.01	8.18	9370.41		nonDEG	9292.22	60.1	8.7	8.43	9369.45
DEG_G1	71.56	136.5	1.86	1.94	211.86		DEG_G1	80.08	206.3	2.06	1.43	289.87		DEG_G1	79.79	206	2.46	0.81	289.06		DEG_G1	87.05	248.85	1.71	1.65	339.26		DEG_G1	87.4	248.69	2.49	0.75	339.33		DEG_G1	92.02	290.97	1.81	1.04	385.84		DEG_G1	98.44	333.4	1.22	1.07	434.13
DEG_G2	69.22	1.93	135.1	2.31	208.56		DEG_G2	66.55	2.74	121.55	1.22	192.06		DEG_G2	74.45	3.19	163.03	0.8	241.47		DEG_G2	61.67	2.68	80.26	0.97	145.58		DEG_G2	69.43	2.94	121.19	0.68	194.24		DEG_G2	62.29	3.43	80.21	0.47	146.4		DEG_G2	56.09	3.52	39.69	0.55	99.85
DEG_G3	70.11	2.02	2.14	135.58	209.85		DEG_G3	60.78	2.34	1.53	81.3	145.95		DEG_G3	53.34	2.04	2	39.69	97.07		DEG_G3	61.48	2.67	1.09	81.29	146.53		DEG_G3	52.8	2.45	1.34	39.53	96.12		DEG_G3	53.16	2.91	0.97	40.31	97.35		DEG_G3	53.25	2.98	0.39	39.95	96.57
Confusion matrices under PDEG = 0.25
		PG1 = 1/3	PG2 = 1/3	PG3 = 1/3					PG1 = 0.5	PG2 = 0.3	PG3 = 0.2					PG1 = 0.5	PG2 = 0.4	PG3 = 0.1					PG1 = 0.6	PG2 = 0.2	PG3 = 0.2					PG1 = 0.6	PG2 = 0.3	PG3 = 0.1					PG1 = 0.7	PG2 = 0.2	PG3 = 0.1					PG1 = 0.8	PG2 = 0.1	PG3 = 0.1
EEE-baySeq	nonDEG	DEG_G1	DEG_G2	DEG_G3	Total		EEE-baySeq	nonDEG	DEG_G1	DEG_G2	DEG_G3	Total		EEE-baySeq	nonDEG	DEG_G1	DEG_G2	DEG_G3	Total		EEE-baySeq	nonDEG	DEG_G1	DEG_G2	DEG_G3	Total		EEE-baySeq	nonDEG	DEG_G1	DEG_G2	DEG_G3	Total		EEE-baySeq	nonDEG	DEG_G1	DEG_G2	DEG_G3	Total		EEE-baySeq	nonDEG	DEG_G1	DEG_G2	DEG_G3	Total
nonDEG	7442.7	206.47	207.24	205.36	8061.77		nonDEG	7442.71	291.78	188.76	132.85	8056.1		nonDEG	7441.52	291.86	239.79	71.44	8044.61		nonDEG	7440.74	340.27	132.15	132.96	8046.12		nonDEG	7441.67	339.47	187.51	71.12	8039.77		nonDEG	7440.83	383.93	132.14	71.05	8027.95		nonDEG	7438.48	424.88	70.15	72.33	8005.84
DEG_G1	19.1	617.75	4.63	3.82	645.3		DEG_G1	27.89	949.77	5.66	4.48	987.8		DEG_G1	28.27	949.28	6.91	2.52	986.98		DEG_G1	34.79	1152.06	4.89	4.82	1196.56		DEG_G1	33.8	1152.57	6.35	2.92	1195.64		DEG_G1	40.43	1359.65	5.49	3.51	1409.08		DEG_G1	47.29	1570.13	3.58	3.6	1624.6
DEG_G2	19.78	4.38	616.93	4.33	645.42		DEG_G2	17.13	5.04	552.97	2.79	577.93		DEG_G2	23.66	6.84	751.54	2.43	784.47		DEG_G2	12	4.05	361.22	1.92	379.19		DEG_G2	17.59	5.74	554.69	1.83	579.85		DEG_G2	12.13	4.26	361.12	1.36	378.87		DEG_G2	7.38	2.44	175.54	0.89	186.25
DEG_G3	19.42	4.4	4.2	619.49	647.51		DEG_G3	12.27	3.41	2.61	359.88	378.17		DEG_G3	6.55	2.02	1.76	173.61	183.94		DEG_G3	12.47	3.62	1.74	360.3	378.13		DEG_G3	6.94	2.22	1.45	174.13	184.74		DEG_G3	6.61	2.16	1.25	174.08	184.1		DEG_G3	6.85	2.55	0.73	173.18	183.31
SSS-baySeq	nonDEG	DEG_G1	DEG_G2	DEG_G3	Total		SSS-baySeq	nonDEG	DEG_G1	DEG_G2	DEG_G3	Total		SSS-baySeq	nonDEG	DEG_G1	DEG_G2	DEG_G3	Total		SSS-baySeq	nonDEG	DEG_G1	DEG_G2	DEG_G3	Total		SSS-baySeq	nonDEG	DEG_G1	DEG_G2	DEG_G3	Total		SSS-baySeq	nonDEG	DEG_G1	DEG_G2	DEG_G3	Total		SSS-baySeq	nonDEG	DEG_G1	DEG_G2	DEG_G3	Total
nonDEG	7443.55	207.64	207.72	205.59	8064.5		nonDEG	7441.89	291.97	188.8	132.97	8055.63		nonDEG	7441.17	290.99	239.68	71.64	8043.48		nonDEG	7441.19	339.68	132.32	132.54	8045.73		nonDEG	7441.27	339.04	187.68	71.18	8039.17		nonDEG	7440.27	381.38	131.82	71.23	8024.7		nonDEG	7438.4	423.6	69.91	72.3	8004.21
DEG_G1	18.99	616.67	4.47	3.89	644.02		DEG_G1	28.44	949.54	5.62	4.47	988.07		DEG_G1	28.87	950.08	6.72	2.45	988.12		DEG_G1	35.13	1152.43	4.81	4.96	1197.33		DEG_G1	34.22	1153.01	6.36	3.07	1196.66		DEG_G1	40.38	1362.05	5.45	3.51	1411.39		DEG_G1	47.53	1571.37	3.5	3.66	1626.06
DEG_G2	19.25	4.17	616.56	4.38	644.36		DEG_G2	17.32	4.98	553.07	2.76	578.13		DEG_G2	23.33	6.86	751.86	2.39	784.44		DEG_G2	11.72	4.05	361.14	2.1	379.01		DEG_G2	17.84	5.8	554.56	1.71	579.91		DEG_G2	12.62	4.2	361.32	1.36	379.5		DEG_G2	7.45	2.54	175.8	0.8	186.59
DEG_G3	19.21	4.52	4.25	619.14	647.12		DEG_G3	12.35	3.51	2.51	359.8	378.17		DEG_G3	6.63	2.07	1.74	173.52	183.96		DEG_G3	11.96	3.84	1.73	360.4	377.93		DEG_G3	6.67	2.15	1.4	174.04	184.26		DEG_G3	6.73	2.37	1.41	173.9	184.41		DEG_G3	6.62	2.49	0.79	173.24	183.14
E-baySeq	nonDEG	DEG_G1	DEG_G2	DEG_G3	Total		E-baySeq	nonDEG	DEG_G1	DEG_G2	DEG_G3	Total		E-baySeq	nonDEG	DEG_G1	DEG_G2	DEG_G3	Total		E-baySeq	nonDEG	DEG_G1	DEG_G2	DEG_G3	Total		E-baySeq	nonDEG	DEG_G1	DEG_G2	DEG_G3	Total		E-baySeq	nonDEG	DEG_G1	DEG_G2	DEG_G3	Total		E-baySeq	nonDEG	DEG_G1	DEG_G2	DEG_G3	Total
nonDEG	7442.83	206.8	207.41	205.33	8062.37		nonDEG	7438.58	305.8	187.05	127.92	8059.35		nonDEG	7437.24	305.23	243.21	67.41	8053.09		nonDEG	7428.4	368.53	127.47	127.26	8051.66		nonDEG	7428.26	367.92	184.75	67.25	8048.18		nonDEG	7403.37	431.48	125.67	66.93	8027.45		nonDEG	7349.67	507.83	64.99	67.12	7989.61
DEG_G1	19.17	617.71	4.52	3.73	645.13		DEG_G1	30.82	935.17	6.62	4.82	977.43		DEG_G1	30.31	934.57	8.7	2.52	976.1		DEG_G1	45.51	1123.25	5.94	6.3	1181		DEG_G1	45.32	1122.89	8.56	3.48	1180.25		DEG_G1	74.89	1311.5	8.13	4.52	1399.04		DEG_G1	133.23	1486.45	5.69	5.6	1630.97
DEG_G2	19.58	4.11	616.82	4.41	644.92		DEG_G2	16.99	5.6	554.09	2.43	579.11		DEG_G2	23.35	8.5	746.73	2.22	780.8		DEG_G2	12.64	4.31	365.25	1.45	383.65		DEG_G2	17.06	7.03	555.58	1.35	581.02		DEG_G2	13.03	4.72	365.28	0.92	383.95		DEG_G2	8.88	2.82	178.88	0.56	191.14
DEG_G3	19.42	4.38	4.25	619.53	647.58		DEG_G3	13.61	3.43	2.24	364.83	384.11		DEG_G3	9.1	1.7	1.36	177.85	190.01		DEG_G3	13.45	3.91	1.34	364.99	383.69		DEG_G3	9.36	2.16	1.11	177.92	190.55		DEG_G3	8.71	2.3	0.92	177.63	189.56		DEG_G3	8.22	2.9	0.44	176.72	188.28
M-baySeq	nonDEG	DEG_G1	DEG_G2	DEG_G3	Total		M-baySeq	nonDEG	DEG_G1	DEG_G2	DEG_G3	Total		M-baySeq	nonDEG	DEG_G1	DEG_G2	DEG_G3	Total		M-baySeq	nonDEG	DEG_G1	DEG_G2	DEG_G3	Total		M-baySeq	nonDEG	DEG_G1	DEG_G2	DEG_G3	Total		M-baySeq	nonDEG	DEG_G1	DEG_G2	DEG_G3	Total		M-baySeq	nonDEG	DEG_G1	DEG_G2	DEG_G3	Total
nonDEG	7443.85	207.33	207.08	205.23	8063.49		nonDEG	7442.12	297.31	187.62	131.19	8058.24		nonDEG	7442.17	297.09	241.05	69.83	8050.14		nonDEG	7439.76	352.19	130.02	130.18	8052.15		nonDEG	7441.26	350.85	186.43	69.72	8048.26		nonDEG	7436.76	403.76	129.45	69.3	8039.27		nonDEG	7430.99	456.62	67.64	70.2	8025.45
DEG_G1	19.06	616.83	4.74	3.85	644.48		DEG_G1	28.19	943.92	6.15	4.78	983.04		DEG_G1	28.02	943.43	7.57	2.45	981.47		DEG_G1	35.87	1139.94	5.35	5.54	1186.7		DEG_G1	34.59	1140.59	7.05	3.17	1185.4		DEG_G1	43.95	1339.63	6.36	3.89	1393.83		DEG_G1	54.29	1538.17	4.35	4.44	1601.25
DEG_G2	19.2	4.33	616.95	4.3	644.78		DEG_G2	17.2	5.39	553.87	2.54	579		DEG_G2	23.26	7.54	749.66	2.41	782.87		DEG_G2	12	4.03	363.08	1.73	380.84		DEG_G2	17.11	6.39	555.35	1.68	580.53		DEG_G2	12.39	4.32	363.1	1	380.81		DEG_G2	7.68	2.56	177.47	0.67	188.38
DEG_G3	18.89	4.51	4.23	619.62	647.25		DEG_G3	12.49	3.38	2.36	361.49	379.72		DEG_G3	6.55	1.94	1.72	175.31	185.52		DEG_G3	12.37	3.84	1.55	362.55	380.31		DEG_G3	7.04	2.17	1.17	175.43	185.81		DEG_G3	6.9	2.29	1.09	175.81	186.09		DEG_G3	7.04	2.65	0.54	174.69	184.92
EEE-EBSeq	nonDEG	DEG_G1	DEG_G2	DEG_G3	Total		EEE-EBSeq	nonDEG	DEG_G1	DEG_G2	DEG_G3	Total		EEE-EBSeq	nonDEG	DEG_G1	DEG_G2	DEG_G3	Total		EEE-EBSeq	nonDEG	DEG_G1	DEG_G2	DEG_G3	Total		EEE-EBSeq	nonDEG	DEG_G1	DEG_G2	DEG_G3	Total		EEE-EBSeq	nonDEG	DEG_G1	DEG_G2	DEG_G3	Total		EEE-EBSeq	nonDEG	DEG_G1	DEG_G2	DEG_G3	Total
nonDEG	7047.56	79.74	79.74	80.86	7287.9		nonDEG	7050.18	113.46	72.52	51.08	7287.24		nonDEG	7054.98	114.01	91.76	28.36	7289.11		nonDEG	7055.28	131.39	51.35	50.71	7288.73		nonDEG	7058.92	131.28	71.91	28.48	7290.59		nonDEG	7059.57	149.46	51.42	29.19	7289.64		nonDEG	7063.62	168.92	28.13	28.66	7289.33
DEG_G1	150.4	723	15.29	14.53	903.22		DEG_G1	191.38	1101.56	17.82	12.59	1323.35		DEG_G1	192.47	1101.35	20.96	6.91	1321.69		DEG_G1	215.21	1331.53	14.28	14.08	1575.1		DEG_G1	215.06	1333.73	18.3	8.2	1575.29		DEG_G1	241.48	1563.75	14.73	8.62	1828.58		DEG_G1	267.86	1796.44	9.63	9.45	2083.38
DEG_G2	150.52	14.97	723.08	14.41	902.98		DEG_G2	142.82	19.2	648.59	9.79	820.4		DEG_G2	170.19	22.5	876.72	6.78	1076.19		DEG_G2	114.35	18.6	426.11	8.28	567.34		DEG_G2	143.51	21.34	651.38	5.85	822.08		DEG_G2	115.94	21.09	427.48	4.41	568.92		DEG_G2	85.57	17.17	208.9	3.88	315.52
DEG_G3	152.52	15.28	14.89	723.2	905.89		DEG_G3	115.62	15.77	11.07	426.54	569		DEG_G3	82.36	12.14	10.56	207.95	313.01		DEG_G3	115.16	18.48	8.26	426.93	568.83		DEG_G3	82.51	13.65	8.41	207.47	312.04		DEG_G3	83.01	15.7	6.37	207.78	312.86		DEG_G3	82.95	17.46	3.34	208.01	311.76
SSS-EBSeq	nonDEG	DEG_G1	DEG_G2	DEG_G3	Total		SSS-EBSeq	nonDEG	DEG_G1	DEG_G2	DEG_G3	Total		SSS-EBSeq	nonDEG	DEG_G1	DEG_G2	DEG_G3	Total		SSS-EBSeq	nonDEG	DEG_G1	DEG_G2	DEG_G3	Total		SSS-EBSeq	nonDEG	DEG_G1	DEG_G2	DEG_G3	Total		SSS-EBSeq	nonDEG	DEG_G1	DEG_G2	DEG_G3	Total		SSS-EBSeq	nonDEG	DEG_G1	DEG_G2	DEG_G3	Total
nonDEG	7047.49	79.7	79.75	80.89	7287.83		nonDEG	7050.13	113.44	72.46	51.13	7287.16		nonDEG	7054.83	113.72	91.54	28.52	7288.61		nonDEG	7055.08	130.97	51.42	50.83	7288.3		nonDEG	7058.63	130.67	71.93	28.59	7289.82		nonDEG	7059.63	148.35	51.44	29.32	7288.74		nonDEG	7063.02	167.68	28.17	28.72	7287.59
DEG_G1	150.1	722.97	15.34	14.52	902.93		DEG_G1	191.5	1101.58	17.7	12.59	1323.37		DEG_G1	192.49	1101.6	20.74	6.87	1321.7		DEG_G1	215.26	1331.97	14.2	14.02	1575.45		DEG_G1	215.31	1334.36	18.19	8.22	1576.08		DEG_G1	241.4	1564.96	14.61	8.57	1829.54		DEG_G1	268.01	1797.69	9.54	9.36	2084.6
DEG_G2	150.89	14.98	723.06	14.45	903.38		DEG_G2	142.73	19.16	648.72	9.8	820.41		DEG_G2	170.29	22.43	877.1	6.77	1076.59		DEG_G2	114.57	18.59	426.08	8.32	567.56		DEG_G2	143.66	21.26	651.41	5.89	822.22		DEG_G2	116.01	21	427.52	4.47	569		DEG_G2	85.58	17.19	208.9	3.93	315.6
DEG_G3	152.52	15.34	14.85	723.14	905.85		DEG_G3	115.64	15.82	11.12	426.48	569.06		DEG_G3	82.39	12.25	10.62	207.84	313.1		DEG_G3	115.09	18.47	8.3	426.83	568.69		DEG_G3	82.4	13.71	8.47	207.3	311.88		DEG_G3	82.96	15.69	6.43	207.64	312.72		DEG_G3	83.39	17.43	3.39	207.99	312.2
S-EBSeq	nonDEG	DEG_G1	DEG_G2	DEG_G3	Total		S-EBSeq	nonDEG	DEG_G1	DEG_G2	DEG_G3	Total		S-EBSeq	nonDEG	DEG_G1	DEG_G2	DEG_G3	Total		S-EBSeq	nonDEG	DEG_G1	DEG_G2	DEG_G3	Total		S-EBSeq	nonDEG	DEG_G1	DEG_G2	DEG_G3	Total		S-EBSeq	nonDEG	DEG_G1	DEG_G2	DEG_G3	Total		S-EBSeq	nonDEG	DEG_G1	DEG_G2	DEG_G3	Total
nonDEG	7048.02	79.76	79.74	80.98	7288.5		nonDEG	7014.05	125.39	70.76	46.97	7257.17		nonDEG	6996.25	125.16	94.6	24.32	7240.33		nonDEG	6950.32	153.73	47.15	46.36	7197.56		nonDEG	6941.97	153.59	69.43	24.47	7189.46		nonDEG	6813.75	185.39	46.29	24.56	7069.99		nonDEG	6583.12	221.38	23.3	23.96	6851.76
DEG_G1	150.05	722.94	15.33	14.53	902.85		DEG_G1	220.95	1087.9	21.73	13.96	1344.54		DEG_G1	217.73	1085.87	28.29	6.57	1338.46		DEG_G1	315.46	1307.96	18.28	18.24	1659.94		DEG_G1	311.36	1307.88	26.85	9.16	1655.25		DEG_G1	476.48	1526.37	23.05	11.68	2037.58		DEG_G1	737.71	1742.95	15.25	14.47	2510.38
DEG_G2	150.62	14.97	723.07	14.46	903.12		DEG_G2	140.13	21.33	648.66	8.17	818.29		DEG_G2	167.6	28.07	868.71	5.61	1069.99		DEG_G2	116.45	19.22	428.64	6.18	570.49		DEG_G2	133.67	25.47	647.39	4.31	810.84		DEG_G2	109.9	22.76	426.74	2.96	562.36		DEG_G2	90.09	17.91	209.56	2.27	319.83
DEG_G3	152.31	15.32	14.86	723.03	905.52		DEG_G3	124.87	15.38	8.85	430.9	580		DEG_G3	118.42	10.9	8.4	213.5	351.22		DEG_G3	117.77	19.09	5.93	429.21	572		DEG_G3	113	13.06	6.32	212.06	344.44		DEG_G3	99.87	15.48	3.91	210.8	330.06		DEG_G3	89.08	17.76	1.89	209.3	318.03
M-EBSeq	nonDEG	DEG_G1	DEG_G2	DEG_G3	Total		M-EBSeq	nonDEG	DEG_G1	DEG_G2	DEG_G3	Total		M-EBSeq	nonDEG	DEG_G1	DEG_G2	DEG_G3	Total		M-EBSeq	nonDEG	DEG_G1	DEG_G2	DEG_G3	Total		M-EBSeq	nonDEG	DEG_G1	DEG_G2	DEG_G3	Total		M-EBSeq	nonDEG	DEG_G1	DEG_G2	DEG_G3	Total		M-EBSeq	nonDEG	DEG_G1	DEG_G2	DEG_G3	Total
nonDEG	7050.2	79.67	79.85	81.09	7290.81		nonDEG	7049.37	117.51	71.94	49.97	7288.79		nonDEG	7052.89	117.77	92.82	27.09	7290.57		nonDEG	7049.13	138.94	49.95	49.22	7287.24		nonDEG	7051.6	139.08	71.26	27.35	7289.29		nonDEG	7039.62	162.7	49.76	27.63	7279.71		nonDEG	7021.86	189.34	26.53	27.04	7264.77
DEG_G1	149.56	723.03	15.34	14.52	902.45		DEG_G1	193.63	1096.88	18.89	12.95	1322.35		DEG_G1	194.09	1096.83	22.97	6.85	1320.74		DEG_G1	223.93	1323.44	15.62	15.27	1578.26		DEG_G1	223.86	1324.78	20.48	8.54	1577.66		DEG_G1	262.85	1549.74	16.83	9.52	1838.94		DEG_G1	310.17	1775.03	11.14	10.75	2107.09
DEG_G2	149.71	14.97	722.99	14.34	902.01		DEG_G2	141.68	20.01	649.04	9.18	819.91		DEG_G2	168.95	24.01	874.68	6.42	1074.06		DEG_G2	112.92	18.87	427.24	7.36	566.39		DEG_G2	140.91	22.92	650.85	5.39	820.07		DEG_G2	113.38	22.01	428.2	3.89	567.48		DEG_G2	85.57	17.82	209.63	3.19	316.21
DEG_G3	151.53	15.33	14.82	723.05	904.73		DEG_G3	115.32	15.6	10.13	427.9	568.95		DEG_G3	84.07	11.39	9.53	209.64	314.63		DEG_G3	114.02	18.75	7.19	428.15	568.11		DEG_G3	83.63	13.22	7.41	208.72	312.98		DEG_G3	84.15	15.55	5.21	208.96	313.87		DEG_G3	82.4	17.81	2.7	209.02	311.93

## Sheet: Sheet5
	actual FDR values
	PG1	1/3	0.5	0.5	0.6	0.6	0.7	0.8
	PG2	1/3	0.3	0.4	0.2	0.3	0.2	0.1
	PG3	1/3	0.2	0.1	0.2	0.1	0.1	0.1
	PDEG = 0.05
	EEE-baySeq	0.0453144	0.0458907	0.0471736	0.0454924	0.0442429	0.0448159	0.0463382
	SSS-baySeq	0.0464212	0.0445234	0.0460451	0.0464359	0.0444567	0.0452899	0.0468072
	E-baySeq	0.0465451	0.0473897	0.0473028	0.0467281	0.0463752	0.0467141	0.0470841
	M-baySeq	0.044395	0.0462841	0.0473873	0.0455872	0.045086	0.0438327	0.0461629
	EEE-EBSeq	0.33534	0.331499	0.331998	0.333682	0.334059	0.329956	0.330597
	SSS-EBSeq	0.335283	0.331674	0.331923	0.33346	0.333936	0.330199	0.33043
	S-EBSeq	0.339732	0.336281	0.336972	0.339038	0.339547	0.33699	0.33873
	M-EBSeq	0.334178	0.330042	0.330465	0.332687	0.332696	0.329234	0.329249
	PDEG = 0.25
	EEE-baySeq	0.0300607	0.0294617	0.0298996	0.0303017	0.0297448	0.0299882	0.0308308
	SSS-baySeq	0.0296634	0.0298747	0.0300575	0.0300724	0.029943	0.0302239	0.0308396
	E-baySeq	0.0300038	0.0316305	0.0322234	0.0367312	0.0367405	0.0489541	0.0747256
	M-baySeq	0.0294845	0.0297953	0.029642	0.0309079	0.0300845	0.0322352	0.0349306
	EEE-EBSeq	0.167151	0.165779	0.164129	0.163971	0.162755	0.162442	0.160937
	SSS-EBSeq	0.167175	0.165793	0.164156	0.16402	0.162816	0.162369	0.161057
	S-EBSeq	0.167019	0.177132	0.182502	0.196052	0.198468	0.234078	0.291086
	M-EBSeq	0.166355	0.166172	0.164987	0.166149	0.165372	0.169173	0.174752

## Sheet: Sheet6
	Sensitivities
	PG1	1/3	0.5	0.5	0.6	0.6	0.7	0.8
	PG2	1/3	0.3	0.4	0.2	0.3	0.2	0.1
	PG3	1/3	0.2	0.1	0.2	0.1	0.1	0.1
	PDEG = 0.05
	EEE-baySeq	0.691657	0.69404	0.69612	0.69838	0.69764	0.69984	0.70722
	SSS-baySeq	0.690818	0.69502	0.69566	0.69842	0.69772	0.69956	0.70746
	E-baySeq	0.691257	0.69438	0.69522	0.69746	0.69606	0.69694	0.7031
	M-baySeq	0.690958	0.69472	0.69508	0.6975	0.69668	0.69864	0.70516
	EEE-EBSeq	0.837365	0.8408	0.84034	0.84288	0.84008	0.8454	0.84664
	SSS-EBSeq	0.837186	0.84078	0.84044	0.8431	0.8404	0.84536	0.84692
	S-EBSeq	0.839162	0.84198	0.84088	0.84358	0.84062	0.84452	0.84416
	M-EBSeq	0.837086	0.84094	0.84004	0.84234	0.84012	0.84424	0.84554
	PDEG = 0.25
	EEE-baySeq	0.752273	0.754644	0.758764	0.757848	0.76076	0.765152	0.773056
	SSS-baySeq	0.751521	0.754504	0.759076	0.758184	0.76084	0.766228	0.773676
	E-baySeq	0.752085	0.751692	0.75366	0.750696	0.752032	0.750368	0.744024
	M-baySeq	0.752045	0.753552	0.756812	0.755044	0.7572	0.758996	0.762216
	EEE-EBSeq	0.903802	0.905152	0.906336	0.906604	0.90732	0.907948	0.909708
	SSS-EBSeq	0.903798	0.905184	0.906472	0.906704	0.907516	0.908348	0.910144
	S-EBSeq	0.903745	0.902724	0.902344	0.901088	0.900972	0.897476	0.892536
	M-EBSeq	0.903717	0.904232	0.904928	0.904756	0.904924	0.903964	0.902836

## Sheet: Sheet7
	Specificities
	PG1	1/3	0.5	0.5	0.6	0.6	0.7	0.8
	PG2	1/3	0.3	0.4	0.2	0.3	0.2	0.1
	PG3	1/3	0.2	0.1	0.2	0.1	0.1	0.1
	PDEG = 0.05
	EEE-baySeq	0.998263	0.998236	0.998181	0.998245	0.998296	0.998267	0.998184
	SSS-baySeq	0.998219	0.998291	0.998227	0.998205	0.998287	0.998248	0.998163
	E-baySeq	0.998215	0.998176	0.998178	0.998196	0.998213	0.998196	0.998162
	M-baySeq	0.998301	0.998218	0.998176	0.998241	0.998261	0.998309	0.998196
	EEE-EBSeq	0.977691	0.978046	0.978013	0.977778	0.977817	0.978078	0.977987
	SSS-EBSeq	0.977698	0.978028	0.978013	0.977801	0.977829	0.978054	0.977995
	S-EBSeq	0.977203	0.977537	0.977495	0.977218	0.977246	0.9774	0.977233
	M-EBSeq	0.977799	0.978167	0.978149	0.977874	0.977934	0.978161	0.978128
	PDEG = 0.25
	EEE-baySeq	0.992229	0.992361	0.992203	0.992099	0.992223	0.992111	0.991797
	SSS-baySeq	0.992341	0.992252	0.992156	0.992159	0.992169	0.992036	0.991787
	E-baySeq	0.992245	0.991811	0.991632	0.990453	0.990435	0.987116	0.979957
	M-baySeq	0.992381	0.992283	0.992289	0.991968	0.992168	0.991568	0.990799
	EEE-EBSeq	0.939563	0.940032	0.940675	0.940716	0.941208	0.941297	0.941831
	SSS-EBSeq	0.939557	0.940028	0.940668	0.940691	0.941168	0.941299	0.941759
	S-EBSeq	0.939624	0.935221	0.932859	0.926731	0.925616	0.908525	0.877777
	M-EBSeq	0.939901	0.939916	0.940385	0.939884	0.940213	0.938616	0.936248
