# Supplementary material for: Accurate Classification of Differential Expression Patterns in a Bayesian Framework With Robust Normalization for Multi-Group RNA-Seq Count Data
Source: Bioinform Biol Insights. 2019 Jul 8;13:1177932219860817. doi: 10.1177/1177932219860817 (PMC6614939; doi:10.1177/1177932219860817)
Supplement: Additional4_xyz1922271719133 – Supplemental material for Accurate Classification of Differential Expression Patterns in a Bayesian Framework With Robust Normalization for Multi-Group RNA-Seq Count Data [file Additional4_xyz1922271719133.xlsx]

## Sheet: Sheet1
	AUC values
	PG1	1/3	0.5	0.5	0.6	0.6	0.7	0.8
	PG2	1/3	0.3	0.4	0.2	0.3	0.2	0.1
	PG3	1/3	0.2	0.1	0.2	0.1	0.1	0.1
	PDEG = 0.05
	EEE-baySeq	96.3319	96.3472	96.3789	96.4853	96.4134	96.4657	96.5236
	SSS-baySeq	96.3438	96.3761	96.393	96.4494	96.4229	96.4914	96.5538
	E-baySeq	96.3279	96.3496	96.3526	96.4278	96.3372	96.4106	96.4197
	M-baySeq	96.3173	96.3676	96.3587	96.445	96.3985	96.4444	96.5012
	EEE-EBSeq	96.8194	96.891	96.9143	96.9952	96.951	97.0142	96.9978
	SSS-EBSeq	96.8213	96.8941	96.9126	96.9946	96.9548	97.0192	97.0029
	S-EBSeq	96.8272	96.8925	96.9007	96.9738	96.9259	96.9621	96.9136
	M-EBSeq	96.8217	96.8847	96.9009	96.9977	96.9508	97.0037	96.9733
	PDEG = 0.25
	EEE-baySeq	96.4224	96.464	96.4947	96.5131	96.5574	96.6113	96.6954
	SSS-baySeq	96.4076	96.47	96.4898	96.5158	96.5493	96.6474	96.7154
	E-baySeq	96.4088	96.3063	96.2702	96.0877	96.0819	95.6481	94.7303
	M-baySeq	96.419	96.4262	96.4294	96.4204	96.4361	96.3895	96.3073
	EEE-EBSeq	96.8576	96.886	96.9194	96.88	96.941	96.9764	97.0151
	SSS-EBSeq	96.8569	96.8881	96.9247	96.8805	96.9447	96.9838	97.028
	S-EBSeq	96.8575	96.7006	96.6145	96.3761	96.3816	95.8465	94.8538
	M-EBSeq	96.8571	96.8542	96.8802	96.7937	96.8413	96.7965	96.6895

## Sheet: Sheet2
	Accuracies
	PG1	1/3	0.5	0.5	0.6	0.6	0.7	0.8
	PG2	1/3	0.3	0.4	0.2	0.3	0.2	0.1
	PG3	1/3	0.2	0.1	0.2	0.1	0.1	0.1
	PDEG = 0.05
	EEE-baySeq	98.2698	98.2836	98.2908	98.3061	98.3081	98.3202	98.3511
	SSS-baySeq	98.2616	98.2945	98.2917	98.3044	98.307	98.3161	98.3502
	E-baySeq	98.2637	98.2801	98.2856	98.2986	98.2934	98.2992	98.3279
	M-baySeq	98.2696	98.2862	98.2845	98.3038	98.3004	98.3187	98.342
	EEE-EBSeq	96.9319	96.989	96.986	96.987	96.9805	97.0318	97.0392
	SSS-EBSeq	96.9302	96.9886	96.9853	96.9834	96.9786	97.0287	97.0389
	S-EBSeq	96.8919	96.9494	96.9409	96.9337	96.9248	96.9583	96.9507
	M-EBSeq	96.9369	97.0046	96.9993	96.9969	96.9893	97.0342	97.042
	PDEG = 0.25
	EEE-baySeq	92.9632	93.0455	93.1531	93.1358	93.2238	93.3492	93.5667
	SSS-baySeq	92.9532	93.0379	93.1598	93.1455	93.2222	93.3678	93.5828
	E-baySeq	92.9656	92.9183	92.955	92.8102	92.8358	92.5649	91.8982
	M-baySeq	92.9651	93.007	93.0997	93.0458	93.1181	93.1453	93.2054
	EEE-EBSeq	92.1138	92.2208	92.3634	92.3526	92.478	92.5508	92.7448
	SSS-EBSeq	92.1123	92.2185	92.3674	92.358	92.4722	92.5601	92.7572
	S-EBSeq	92.1162	91.7499	91.5649	91.0839	91.0079	89.6636	87.3132
	M-EBSeq	92.1382	92.1798	92.2914	92.2322	92.3159	92.2209	92.1282

## Sheet: Sheet3
	Computation times (in seconds)
	PG1	1/3	0.5	0.5	0.6	0.6	0.7	0.8
	PG2	1/3	0.3	0.4	0.2	0.3	0.2	0.1
	PG3	1/3	0.2	0.1	0.2	0.1	0.1	0.1
	PDEG = 0.05
	EEE-baySeq	1738.5	1724.5	1735.51	1730.81	1729.81	1728.09	1738.76
	SSS-baySeq	1768.28	1752.89	1766.66	1760.63	1758.93	1800.96	1806.58
	E-baySeq	1713.52	1699.25	1710.45	1709.08	1710.51	1709.29	1718.79
	M-baySeq	1725.45	1696.38	1706.24	1694.66	1700.4	1696.07	1697.06
	EEE-EBSeq	798.3	771.405	769.442	791.929	798.792	812.359	844.204
	SSS-EBSeq	810.977	820.864	807.485	830.418	825.605	873.552	918.42
	S-EBSeq	751.599	764.879	757.258	767.217	770.902	777.981	807.916
	M-EBSeq	733.564	727.136	740.855	770.631	750.622	791.892	794.156
	PDEG = 0.25
	EEE-baySeq	1763.6	1760.32	1735.69	1716.82	1716.84	1709.02	1695.45
	SSS-baySeq	1789.51	1786.59	1761.06	1745.04	1739.96	1735.53	1713.26
	E-baySeq	1734.53	1733.18	1707.89	1694.56	1691.1	1685.46	1677.36
	M-baySeq	1696.98	1714.77	1715.72	1699.75	1702.85	1637.93	1648.39
	EEE-EBSeq	653.892	719.619	690.075	677.915	684.547	695.645	700.395
	SSS-EBSeq	673.934	758.645	715.849	716.08	707.956	716.086	732.751
	S-EBSeq	632.647	703.691	678.712	655.714	654.604	675.321	657.879
	M-EBSeq	628.69	678.363	668.734	667.997	642.867	648.11	678.625

## Sheet: Sheet4
Confusion matrices under PDEG = 0.05
		PG1 = 1/3	PG2 = 1/3	PG3 = 1/3					PG1 = 0.5	PG2 = 0.3	PG3 = 0.2					PG1 = 0.5	PG2 = 0.4	PG3 = 0.1					PG1 = 0.6	PG2 = 0.2	PG3 = 0.2					PG1 = 0.6	PG2 = 0.3	PG3 = 0.1					PG1 = 0.7	PG2 = 0.2	PG3 = 0.1					PG1 = 0.8	PG2 = 0.1	PG3 = 0.1
EEE-baySeq	nonDEG	DEG_G1	DEG_G2	DEG_G3	Total		EEE-baySeq	nonDEG	DEG_G1	DEG_G2	DEG_G3	Total		EEE-baySeq	nonDEG	DEG_G1	DEG_G2	DEG_G3	Total		EEE-baySeq	nonDEG	DEG_G1	DEG_G2	DEG_G3	Total		EEE-baySeq	nonDEG	DEG_G1	DEG_G2	DEG_G3	Total		EEE-baySeq	nonDEG	DEG_G1	DEG_G2	DEG_G3	Total		EEE-baySeq	nonDEG	DEG_G1	DEG_G2	DEG_G3	Total
nonDEG	9482.52	50.91	52.04	51.58	9637.05		nonDEG	9483.32	74.33	46.98	31.72	9636.35		nonDEG	9482.81	73.67	61.74	16.57	9634.79		nonDEG	9483.39	87.23	32.05	31.6	9634.27		nonDEG	9483.9	87.08	47.83	16.33	9635.14		nonDEG	9483.58	100.76	32.81	16.58	9633.73		nonDEG	9482.84	113.41	16.64	16.41	9629.3
DEG_G1	5.76	115.45	0.32	0.3	121.83		DEG_G1	7.52	174.9	0.33	0.31	183.06		DEG_G1	7.69	175.54	0.46	0.15	183.84		DEG_G1	8.11	211.95	0.31	0.39	220.76		DEG_G1	7.95	212.13	0.46	0.21	220.75		DEG_G1	9.59	248.45	0.28	0.15	258.47		DEG_G1	10.81	285.92	0.26	0.22	297.21
DEG_G2	5.32	0.34	114.27	0.32	120.25		DEG_G2	5.47	0.38	102.43	0.22	108.5		DEG_G2	6.29	0.51	137.61	0.14	144.55		DEG_G2	4.27	0.42	67.44	0.12	72.25		DEG_G2	5.17	0.4	101.47	0.12	107.16		DEG_G2	4.16	0.38	66.81	0.07	71.42		DEG_G2	3.24	0.32	33.04	0.06	36.66
DEG_G3	5.31	0.28	0.32	114.74	120.65		DEG_G3	3.59	0.26	0.2	67.71	71.76		DEG_G3	3.16	0.21	0.16	33.12	36.65		DEG_G3	4.17	0.34	0.17	67.83	72.51		DEG_G3	2.91	0.31	0.2	33.31	36.73		DEG_G3	2.66	0.34	0.05	33.18	36.23		DEG_G3	3.03	0.28	0.06	33.31	36.68
DEG_all	0.09	0.02	0.05	0.06	0.22		DEG_all	0.1	0.13	0.06	0.04	0.33		DEG_all	0.05	0.07	0.03	0.02	0.17		DEG_all	0.06	0.06	0.03	0.06	0.21		DEG_all	0.07	0.08	0.04	0.03	0.22		DEG_all	0.01	0.07	0.05	0.02	0.15		DEG_all	0.08	0.07	0	0	0.15
SSS-baySeq	nonDEG	DEG_G1	DEG_G2	DEG_G3	Total		SSS-baySeq	nonDEG	DEG_G1	DEG_G2	DEG_G3	Total		SSS-baySeq	nonDEG	DEG_G1	DEG_G2	DEG_G3	Total		SSS-baySeq	nonDEG	DEG_G1	DEG_G2	DEG_G3	Total		SSS-baySeq	nonDEG	DEG_G1	DEG_G2	DEG_G3	Total		SSS-baySeq	nonDEG	DEG_G1	DEG_G2	DEG_G3	Total		SSS-baySeq	nonDEG	DEG_G1	DEG_G2	DEG_G3	Total
nonDEG	9482.13	50.99	52.27	51.69	9637.08		nonDEG	9483.79	74.03	46.82	31.69	9636.33		nonDEG	9483.23	73.83	61.8	16.6	9635.46		nonDEG	9483	87.2	32.15	31.49	9633.84		nonDEG	9483.78	87.08	47.71	16.38	9634.95		nonDEG	9483.39	100.86	32.83	16.57	9633.65		nonDEG	9482.63	113.2	16.72	16.4	9628.95
DEG_G1	5.67	115.33	0.32	0.29	121.61		DEG_G1	7.29	175.2	0.29	0.32	183.1		DEG_G1	7.53	175.34	0.5	0.17	183.54		DEG_G1	8.59	212.01	0.26	0.36	221.22		DEG_G1	8.11	212.06	0.47	0.21	220.85		DEG_G1	9.57	248.32	0.33	0.14	258.36		DEG_G1	10.86	286.09	0.23	0.23	297.41
DEG_G2	5.51	0.36	114.06	0.34	120.27		DEG_G2	5.23	0.38	102.67	0.18	108.46		DEG_G2	6.3	0.52	137.51	0.11	144.44		DEG_G2	4.17	0.36	67.43	0.13	72.09		DEG_G2	5.06	0.4	101.59	0.11	107.16		DEG_G2	4.34	0.47	66.71	0.07	71.59		DEG_G2	3.33	0.4	33	0.04	36.77
DEG_G3	5.53	0.3	0.31	114.64	120.78		DEG_G3	3.66	0.3	0.18	67.79	71.93		DEG_G3	2.89	0.22	0.15	33.09	36.35		DEG_G3	4.2	0.35	0.14	68	72.69		DEG_G3	3.02	0.38	0.18	33.27	36.85		DEG_G3	2.64	0.28	0.1	33.19	36.21		DEG_G3	3.06	0.25	0.05	33.3	36.66
DEG_all	0.16	0.02	0.04	0.04	0.26		DEG_all	0.03	0.09	0.04	0.02	0.18		DEG_all	0.05	0.09	0.04	0.03	0.21		DEG_all	0.04	0.08	0.02	0.02	0.16		DEG_all	0.03	0.08	0.05	0.03	0.19		DEG_all	0.06	0.07	0.03	0.03	0.19		DEG_all	0.12	0.06	0	0.03	0.21
E-baySeq	nonDEG	DEG_G1	DEG_G2	DEG_G3	Total		E-baySeq	nonDEG	DEG_G1	DEG_G2	DEG_G3	Total		E-baySeq	nonDEG	DEG_G1	DEG_G2	DEG_G3	Total		E-baySeq	nonDEG	DEG_G1	DEG_G2	DEG_G3	Total		E-baySeq	nonDEG	DEG_G1	DEG_G2	DEG_G3	Total		E-baySeq	nonDEG	DEG_G1	DEG_G2	DEG_G3	Total		E-baySeq	nonDEG	DEG_G1	DEG_G2	DEG_G3	Total
nonDEG	9482.08	50.86	52.24	51.62	9636.8		nonDEG	9482.7	74.48	46.88	31.51	9635.57		nonDEG	9482.74	74.37	61.7	16.35	9635.16		nonDEG	9482.89	87.94	31.95	31.43	9634.21		nonDEG	9483.1	88.23	47.61	16.19	9635.13		nonDEG	9482.92	102.71	32.63	16.28	9634.54		nonDEG	9482.58	115.76	16.5	16.2	9631.04
DEG_G1	5.62	115.43	0.34	0.27	121.66		DEG_G1	7.83	174.78	0.34	0.29	183.24		DEG_G1	7.67	174.78	0.46	0.14	183.05		DEG_G1	8.63	211.34	0.31	0.35	220.63		DEG_G1	8.6	211.04	0.51	0.19	220.34		DEG_G1	9.86	246.54	0.29	0.17	256.86		DEG_G1	11.14	283.58	0.28	0.26	295.26
DEG_G2	5.72	0.33	114.11	0.31	120.47		DEG_G2	5.4	0.41	102.57	0.2	108.58		DEG_G2	6.38	0.51	137.66	0.11	144.66		DEG_G2	4.33	0.35	67.57	0.13	72.38		DEG_G2	5.14	0.38	101.7	0.1	107.32		DEG_G2	4.3	0.44	67	0.06	71.8		DEG_G2	3.23	0.31	33.14	0.04	36.72
DEG_G3	5.49	0.34	0.26	114.75	120.84		DEG_G3	3.91	0.24	0.17	67.96	72.28		DEG_G3	3.03	0.25	0.16	33.38	36.82		DEG_G3	4.08	0.31	0.15	68.06	72.6		DEG_G3	3.15	0.28	0.14	33.5	37.07		DEG_G3	2.81	0.26	0.04	33.46	36.57		DEG_G3	3.04	0.29	0.07	33.49	36.89
DEG_all	0.09	0.04	0.05	0.05	0.23		DEG_all	0.16	0.09	0.04	0.04	0.33		DEG_all	0.18	0.09	0.02	0.02	0.31		DEG_all	0.07	0.06	0.02	0.03	0.18		DEG_all	0.01	0.07	0.04	0.02	0.14		DEG_all	0.11	0.05	0.04	0.03	0.23		DEG_all	0.01	0.06	0.01	0.01	0.09
M-baySeq	nonDEG	DEG_G1	DEG_G2	DEG_G3	Total		M-baySeq	nonDEG	DEG_G1	DEG_G2	DEG_G3	Total		M-baySeq	nonDEG	DEG_G1	DEG_G2	DEG_G3	Total		M-baySeq	nonDEG	DEG_G1	DEG_G2	DEG_G3	Total		M-baySeq	nonDEG	DEG_G1	DEG_G2	DEG_G3	Total		M-baySeq	nonDEG	DEG_G1	DEG_G2	DEG_G3	Total		M-baySeq	nonDEG	DEG_G1	DEG_G2	DEG_G3	Total
nonDEG	9482.91	51.03	52.17	51.74	9637.85		nonDEG	9483.08	74.38	46.78	31.57	9635.81		nonDEG	9482.73	74.12	61.92	16.51	9635.28		nonDEG	9483.36	87.74	32.02	31.51	9634.63		nonDEG	9483.55	87.68	47.68	16.34	9635.25		nonDEG	9483.96	101.44	32.78	16.49	9634.67		nonDEG	9482.92	114.56	16.68	16.25	9630.41
DEG_G1	5.46	115.31	0.29	0.33	121.39		DEG_G1	7.47	174.88	0.32	0.29	182.96		DEG_G1	7.79	175.12	0.47	0.15	183.53		DEG_G1	7.99	211.51	0.28	0.34	220.12		DEG_G1	8.6	211.52	0.48	0.19	220.79		DEG_G1	9.35	247.83	0.32	0.15	257.65		DEG_G1	10.77	284.82	0.24	0.23	296.06
DEG_G2	5.21	0.33	114.19	0.31	120.04		DEG_G2	5.15	0.39	102.71	0.17	108.42		DEG_G2	6.36	0.5	137.42	0.14	144.42		DEG_G2	4.21	0.36	67.51	0.11	72.19		DEG_G2	4.94	0.43	101.64	0.11	107.12		DEG_G2	4.05	0.44	66.82	0.07	71.38		DEG_G2	3.16	0.29	33.02	0.05	36.52
DEG_G3	5.3	0.31	0.3	114.55	120.46		DEG_G3	4.2	0.25	0.15	67.95	72.55		DEG_G3	3.01	0.19	0.16	33.18	36.54		DEG_G3	4.33	0.32	0.17	68	72.82		DEG_G3	2.86	0.3	0.16	33.33	36.65		DEG_G3	2.59	0.25	0.05	33.26	36.15		DEG_G3	3.15	0.26	0.05	33.44	36.9
DEG_all	0.12	0.02	0.05	0.07	0.26		DEG_all	0.1	0.1	0.04	0.02	0.26		DEG_all	0.11	0.07	0.03	0.02	0.23		DEG_all	0.11	0.07	0.02	0.04	0.24		DEG_all	0.05	0.07	0.04	0.03	0.19		DEG_all	0.05	0.04	0.03	0.03	0.15		DEG_all	0	0.07	0.01	0.03	0.11
EEE-EBSeq	nonDEG	DEG_G1	DEG_G2	DEG_G3	Total		EEE-EBSeq	nonDEG	DEG_G1	DEG_G2	DEG_G3	Total		EEE-EBSeq	nonDEG	DEG_G1	DEG_G2	DEG_G3	Total		EEE-EBSeq	nonDEG	DEG_G1	DEG_G2	DEG_G3	Total		EEE-EBSeq	nonDEG	DEG_G1	DEG_G2	DEG_G3	Total		EEE-EBSeq	nonDEG	DEG_G1	DEG_G2	DEG_G3	Total		EEE-EBSeq	nonDEG	DEG_G1	DEG_G2	DEG_G3	Total
nonDEG	9288.34	26.41	27.96	27.28	9369.99		nonDEG	9292.27	38.63	25.03	16.18	9372.11		nonDEG	9291.98	38.84	32.51	8.68	9372.01		nonDEG	9290.22	45.57	17.02	16.19	9369		nonDEG	9290.69	45.91	25.17	9.09	9370.86		nonDEG	9292.8	52.01	17.21	8.21	9370.23		nonDEG	9292.08	59.71	8.71	8.49	9368.99
DEG_G1	70.94	135.86	1.66	1.82	210.28		DEG_G1	79.9	205.41	1.92	1.35	288.58		DEG_G1	79.76	205.15	2.31	0.8	288.02		DEG_G1	86.6	248.24	1.65	1.48	337.97		DEG_G1	87.34	247.91	2.37	0.75	338.37		DEG_G1	91.93	290.89	1.74	1	385.56		DEG_G1	98.33	332.78	1.16	0.97	433.24
DEG_G2	69.11	1.81	134.34	2.25	207.51		DEG_G2	66.6	2.59	120.6	1.18	190.97		DEG_G2	74.15	2.96	162.11	0.77	239.99		DEG_G2	61.43	2.51	79.59	0.97	144.5		DEG_G2	68.7	2.74	120.33	0.61	192.38		DEG_G2	61.85	3.18	79.57	0.43	145.03		DEG_G2	55.94	3.34	39.43	0.52	99.23
DEG_G3	70.09	1.96	1.97	134.65	208.67		DEG_G3	60.62	2.19	1.41	80.62	144.84		DEG_G3	53.45	1.81	1.82	39.36	96.44		DEG_G3	61.06	2.51	1.03	80.65	145.25		DEG_G3	52.53	2.24	1.27	39.12	95.16		DEG_G3	52.74	2.64	0.89	39.92	96.19		DEG_G3	52.87	2.75	0.36	39.63	95.61
DEG_all	0.52	0.96	1.07	1	3.55		DEG_all	0.61	1.18	1.04	0.67	3.5		DEG_all	0.66	1.24	1.25	0.39	3.54		DEG_all	0.69	1.17	0.71	0.71	3.28		DEG_all	0.74	1.2	0.86	0.43	3.23		DEG_all	0.68	1.28	0.59	0.44	2.99		DEG_all	0.78	1.42	0.34	0.39	2.93
SSS-EBSeq	nonDEG	DEG_G1	DEG_G2	DEG_G3	Total		SSS-EBSeq	nonDEG	DEG_G1	DEG_G2	DEG_G3	Total		SSS-EBSeq	nonDEG	DEG_G1	DEG_G2	DEG_G3	Total		SSS-EBSeq	nonDEG	DEG_G1	DEG_G2	DEG_G3	Total		SSS-EBSeq	nonDEG	DEG_G1	DEG_G2	DEG_G3	Total		SSS-EBSeq	nonDEG	DEG_G1	DEG_G2	DEG_G3	Total		SSS-EBSeq	nonDEG	DEG_G1	DEG_G2	DEG_G3	Total
nonDEG	9288.34	26.44	27.98	27.32	9370.08		nonDEG	9292.15	38.58	25.08	16.15	9371.96		nonDEG	9291.76	38.77	32.49	8.66	9371.68		nonDEG	9289.79	45.54	16.97	16.22	9368.52		nonDEG	9290.4	45.85	25.07	9.15	9370.47		nonDEG	9292.67	52.06	17.24	8.21	9370.18		nonDEG	9292	59.56	8.75	8.52	9368.83
DEG_G1	71.47	135.82	1.64	1.83	210.76		DEG_G1	79.82	205.49	1.95	1.38	288.64		DEG_G1	79.98	205.29	2.37	0.79	288.43		DEG_G1	86.67	248.29	1.62	1.48	338.06		DEG_G1	87.37	247.96	2.4	0.74	338.47		DEG_G1	91.67	290.7	1.72	0.98	385.07		DEG_G1	98.68	332.92	1.14	0.97	433.71
DEG_G2	69.03	1.83	134.29	2.24	207.39		DEG_G2	66.62	2.57	120.54	1.17	190.9		DEG_G2	74.15	2.94	162.1	0.76	239.95		DEG_G2	61.63	2.53	79.68	0.96	144.8		DEG_G2	69.07	2.76	120.41	0.62	192.86		DEG_G2	62.05	3.19	79.57	0.44	145.25		DEG_G2	55.95	3.3	39.38	0.5	99.13
DEG_G3	69.63	1.88	1.96	134.57	208.04		DEG_G3	60.85	2.23	1.39	80.68	145.15		DEG_G3	53.49	1.83	1.85	39.38	96.55		DEG_G3	61.28	2.48	1.06	80.58	145.4		DEG_G3	52.4	2.23	1.27	39.09	94.99		DEG_G3	52.81	2.62	0.88	39.93	96.24		DEG_G3	52.48	2.71	0.37	39.59	95.15
DEG_all	0.53	1.03	1.13	1.04	3.73		DEG_all	0.56	1.13	1.04	0.62	3.35		DEG_all	0.62	1.17	1.19	0.41	3.39		DEG_all	0.63	1.16	0.67	0.76	3.22		DEG_all	0.76	1.2	0.85	0.4	3.21		DEG_all	0.8	1.43	0.59	0.44	3.26		DEG_all	0.89	1.51	0.36	0.42	3.18
S-EBSeq	nonDEG	DEG_G1	DEG_G2	DEG_G3	Total		S-EBSeq	nonDEG	DEG_G1	DEG_G2	DEG_G3	Total		S-EBSeq	nonDEG	DEG_G1	DEG_G2	DEG_G3	Total		S-EBSeq	nonDEG	DEG_G1	DEG_G2	DEG_G3	Total		S-EBSeq	nonDEG	DEG_G1	DEG_G2	DEG_G3	Total		S-EBSeq	nonDEG	DEG_G1	DEG_G2	DEG_G3	Total		S-EBSeq	nonDEG	DEG_G1	DEG_G2	DEG_G3	Total
nonDEG	9283.59	26.1	27.59	27.04	9364.32		nonDEG	9287.83	38.71	24.69	15.75	9366.98		nonDEG	9287.3	38.97	32.3	8.36	9366.93		nonDEG	9284.93	46.28	16.56	15.72	9363.49		nonDEG	9285.2	46.41	24.66	8.82	9365.09		nonDEG	9286.17	53.28	16.78	7.89	9364.12		nonDEG	9284.59	61.43	8.43	8.26	9362.71
DEG_G1	73.07	136.1	1.68	1.84	212.69		DEG_G1	81.82	205.25	2.04	1.39	290.5		DEG_G1	81.6	204.92	2.53	0.8	289.85		DEG_G1	89.87	247.47	1.71	1.54	340.59		DEG_G1	89.85	247.33	2.65	0.77	340.6		DEG_G1	95.74	289.57	1.88	1.03	388.22		DEG_G1	103.55	331.07	1.24	1.02	436.88
DEG_G2	70.43	1.8	134.68	2.23	209.14		DEG_G2	67.65	2.6	120.85	1.15	192.25		DEG_G2	75.7	3.1	162.19	0.73	241.72		DEG_G2	62.43	2.53	79.91	0.91	145.78		DEG_G2	70.38	2.84	120.58	0.58	194.38		DEG_G2	63.25	3.24	79.91	0.42	146.82		DEG_G2	56.92	3.33	39.61	0.47	100.33
DEG_G3	71.33	1.96	1.97	134.82	210.08		DEG_G3	62.01	2.18	1.34	81.01	146.54		DEG_G3	54.71	1.79	1.7	39.68	97.88		DEG_G3	62.06	2.51	1.03	81.06	146.66		DEG_G3	53.84	2.22	1.21	39.37	96.64		DEG_G3	54.1	2.61	0.83	40.18	97.72		DEG_G3	54.11	2.76	0.34	39.8	97.01
DEG_all	0.58	1.04	1.08	1.07	3.77		DEG_all	0.69	1.26	1.08	0.7	3.73		DEG_all	0.69	1.22	1.28	0.43	3.62		DEG_all	0.71	1.21	0.79	0.77	3.48		DEG_all	0.73	1.2	0.9	0.46	3.29		DEG_all	0.74	1.3	0.6	0.48	3.12		DEG_all	0.83	1.41	0.38	0.45	3.07
M-EBSeq	nonDEG	DEG_G1	DEG_G2	DEG_G3	Total		M-EBSeq	nonDEG	DEG_G1	DEG_G2	DEG_G3	Total		M-EBSeq	nonDEG	DEG_G1	DEG_G2	DEG_G3	Total		M-EBSeq	nonDEG	DEG_G1	DEG_G2	DEG_G3	Total		M-EBSeq	nonDEG	DEG_G1	DEG_G2	DEG_G3	Total		M-EBSeq	nonDEG	DEG_G1	DEG_G2	DEG_G3	Total		M-EBSeq	nonDEG	DEG_G1	DEG_G2	DEG_G3	Total
nonDEG	9289.07	26.67	28.02	27.21	9370.97		nonDEG	9293.73	38.67	25.01	16.08	9373.49		nonDEG	9293.42	38.84	32.66	8.7	9373.62		nonDEG	9291.32	45.87	16.97	16.23	9370.39		nonDEG	9291.62	46.05	25.08	9.06	9371.81		nonDEG	9293.89	52.82	17.09	8.22	9372.02		nonDEG	9292.95	60.23	8.71	8.49	9370.38
DEG_G1	71.04	135.6	1.67	1.84	210.15		DEG_G1	79.58	205.32	1.93	1.35	288.18		DEG_G1	79.36	205.14	2.37	0.77	287.64		DEG_G1	86.98	248.05	1.67	1.51	338.21		DEG_G1	86.98	247.73	2.46	0.75	337.92		DEG_G1	91.58	289.99	1.8	0.99	384.36		DEG_G1	98.19	332.29	1.2	1.01	432.69
DEG_G2	68.73	1.8	134.28	2.19	207		DEG_G2	65.89	2.57	120.66	1.15	190.27		DEG_G2	73.76	3	161.98	0.76	239.5		DEG_G2	61	2.55	79.68	0.9	144.13		DEG_G2	68.61	2.74	120.4	0.63	192.38		DEG_G2	61.3	3.2	79.61	0.46	144.57		DEG_G2	55.48	3.29	39.37	0.47	98.61
DEG_G3	69.69	1.94	2.01	134.74	208.38		DEG_G3	60.17	2.22	1.34	80.75	144.48		DEG_G3	52.85	1.81	1.76	39.39	95.81		DEG_G3	60.1	2.49	1.01	80.64	144.24		DEG_G3	52.12	2.23	1.23	39.18	94.76		DEG_G3	52.43	2.63	0.9	39.93	95.89		DEG_G3	52.45	2.72	0.34	39.59	95.1
DEG_all	0.47	0.99	1.02	1.02	3.5		DEG_all	0.63	1.22	1.06	0.67	3.58		DEG_all	0.61	1.21	1.23	0.38	3.43		DEG_all	0.6	1.04	0.67	0.72	3.03		DEG_all	0.67	1.25	0.83	0.38	3.13		DEG_all	0.8	1.36	0.6	0.4	3.16		DEG_all	0.93	1.47	0.38	0.44	3.22
Confusion matrices under PDEG = 0.25
		PG1 = 1/3	PG2 = 1/3	PG3 = 1/3					PG1 = 0.5	PG2 = 0.3	PG3 = 0.2					PG1 = 0.5	PG2 = 0.4	PG3 = 0.1					PG1 = 0.6	PG2 = 0.2	PG3 = 0.2					PG1 = 0.6	PG2 = 0.3	PG3 = 0.1					PG1 = 0.7	PG2 = 0.2	PG3 = 0.1					PG1 = 0.8	PG2 = 0.1	PG3 = 0.1
EEE-baySeq	nonDEG	DEG_G1	DEG_G2	DEG_G3	Total		EEE-baySeq	nonDEG	DEG_G1	DEG_G2	DEG_G3	Total		EEE-baySeq	nonDEG	DEG_G1	DEG_G2	DEG_G3	Total		EEE-baySeq	nonDEG	DEG_G1	DEG_G2	DEG_G3	Total		EEE-baySeq	nonDEG	DEG_G1	DEG_G2	DEG_G3	Total		EEE-baySeq	nonDEG	DEG_G1	DEG_G2	DEG_G3	Total		EEE-baySeq	nonDEG	DEG_G1	DEG_G2	DEG_G3	Total
nonDEG	7442.9	206.63	207.41	205.47	8062.41		nonDEG	7442.96	292.09	188.86	133.04	8056.95		nonDEG	7441.78	292.09	240.02	71.49	8045.38		nonDEG	7441.02	340.59	132.24	133.05	8046.9		nonDEG	7441.9	339.79	187.63	71.14	8040.46		nonDEG	7441.12	384.36	132.25	71.09	8028.82		nonDEG	7438.75	425.33	70.21	72.39	8006.68
DEG_G1	19.02	617.51	4.62	3.8	644.95		DEG_G1	27.68	949.25	5.64	4.46	987.03		DEG_G1	28.15	948.91	6.84	2.51	986.41		DEG_G1	34.57	1151.55	4.87	4.81	1195.8		DEG_G1	33.62	1152.07	6.33	2.92	1194.94		DEG_G1	40.19	1359.12	5.5	3.51	1408.32		DEG_G1	47.02	1569.53	3.55	3.58	1623.68
DEG_G2	19.66	4.34	616.62	4.29	644.91		DEG_G2	17.06	5.04	552.74	2.77	577.61		DEG_G2	23.5	6.79	751.17	2.43	783.89		DEG_G2	11.81	4.03	360.96	1.91	378.71		DEG_G2	17.5	5.65	554.45	1.81	579.41		DEG_G2	12.08	4.2	360.76	1.36	378.4		DEG_G2	7.32	2.37	175.37	0.89	185.95
DEG_G3	19.27	4.38	4.19	619.29	647.13		DEG_G3	12.2	3.41	2.59	359.6	377.8		DEG_G3	6.46	2.01	1.75	173.46	183.68		DEG_G3	12.31	3.58	1.7	360.05	377.64		DEG_G3	6.85	2.17	1.44	173.96	184.42		DEG_G3	6.55	2.13	1.23	173.92	183.83		DEG_G3	6.84	2.51	0.72	173.04	183.11
DEG_all	0.15	0.14	0.16	0.15	0.6		DEG_all	0.1	0.21	0.17	0.13	0.61		DEG_all	0.11	0.2	0.22	0.11	0.64		DEG_all	0.29	0.25	0.23	0.18	0.95		DEG_all	0.13	0.32	0.15	0.17	0.77		DEG_all	0.06	0.19	0.26	0.12	0.63		DEG_all	0.07	0.26	0.15	0.1	0.58
SSS-baySeq	nonDEG	DEG_G1	DEG_G2	DEG_G3	Total		SSS-baySeq	nonDEG	DEG_G1	DEG_G2	DEG_G3	Total		SSS-baySeq	nonDEG	DEG_G1	DEG_G2	DEG_G3	Total		SSS-baySeq	nonDEG	DEG_G1	DEG_G2	DEG_G3	Total		SSS-baySeq	nonDEG	DEG_G1	DEG_G2	DEG_G3	Total		SSS-baySeq	nonDEG	DEG_G1	DEG_G2	DEG_G3	Total		SSS-baySeq	nonDEG	DEG_G1	DEG_G2	DEG_G3	Total
nonDEG	7443.85	207.79	207.9	205.79	8065.33		nonDEG	7442.21	292.28	188.9	133.03	8056.42		nonDEG	7441.39	291.2	239.98	71.66	8044.23		nonDEG	7441.49	340.01	132.46	132.62	8046.58		nonDEG	7441.56	339.43	187.79	71.22	8040		nonDEG	7440.61	381.79	131.98	71.32	8025.7		nonDEG	7438.73	423.94	70.01	72.39	8005.07
DEG_G1	18.86	616.39	4.45	3.85	643.55		DEG_G1	28.21	949.09	5.59	4.45	987.34		DEG_G1	28.65	949.73	6.69	2.45	987.52		DEG_G1	34.95	1152.01	4.8	4.97	1196.73		DEG_G1	33.94	1152.39	6.34	3.03	1195.7		DEG_G1	40.14	1361.49	5.41	3.49	1410.53		DEG_G1	47.21	1570.9	3.51	3.62	1625.24
DEG_G2	19.1	4.14	616.23	4.34	643.81		DEG_G2	17.2	4.95	552.83	2.75	577.73		DEG_G2	23.21	6.83	751.45	2.39	783.88		DEG_G2	11.64	4	360.9	2.08	378.62		DEG_G2	17.74	5.78	554.33	1.69	579.54		DEG_G2	12.49	4.13	360.97	1.35	378.94		DEG_G2	7.36	2.53	175.56	0.78	186.23
DEG_G3	19.08	4.5	4.23	618.85	646.66		DEG_G3	12.19	3.47	2.49	359.66	377.81		DEG_G3	6.62	2.05	1.73	173.41	183.81		DEG_G3	11.88	3.79	1.7	360.15	377.52		DEG_G3	6.59	2.11	1.39	173.94	184.03		DEG_G3	6.65	2.31	1.38	173.71	184.05		DEG_G3	6.56	2.45	0.77	173.09	182.87
DEG_all	0.11	0.18	0.19	0.17	0.65		DEG_all	0.19	0.21	0.19	0.11	0.7		DEG_all	0.13	0.19	0.15	0.09	0.56		DEG_all	0.04	0.19	0.14	0.18	0.55		DEG_all	0.17	0.29	0.15	0.12	0.73		DEG_all	0.11	0.28	0.26	0.13	0.78		DEG_all	0.14	0.18	0.15	0.12	0.59
E-baySeq	nonDEG	DEG_G1	DEG_G2	DEG_G3	Total		E-baySeq	nonDEG	DEG_G1	DEG_G2	DEG_G3	Total		E-baySeq	nonDEG	DEG_G1	DEG_G2	DEG_G3	Total		E-baySeq	nonDEG	DEG_G1	DEG_G2	DEG_G3	Total		E-baySeq	nonDEG	DEG_G1	DEG_G2	DEG_G3	Total		E-baySeq	nonDEG	DEG_G1	DEG_G2	DEG_G3	Total		E-baySeq	nonDEG	DEG_G1	DEG_G2	DEG_G3	Total
nonDEG	7443.12	206.89	207.56	205.45	8063.02		nonDEG	7438.76	306.03	187.23	128.03	8060.05		nonDEG	7437.62	305.56	243.55	67.51	8054.24		nonDEG	7428.65	368.84	127.6	127.4	8052.49		nonDEG	7428.5	368.29	184.96	67.33	8049.08		nonDEG	7403.69	431.77	125.81	66.98	8028.25		nonDEG	7350.02	508.06	65.03	67.24	7990.35
DEG_G1	19.01	617.53	4.48	3.73	644.75		DEG_G1	30.75	934.74	6.58	4.81	976.88		DEG_G1	30.05	934.01	8.64	2.51	975.21		DEG_G1	45.33	1122.82	5.91	6.3	1180.36		DEG_G1	45.1	1122.38	8.54	3.44	1179.46		DEG_G1	74.67	1311.04	8.09	4.51	1398.31		DEG_G1	132.92	1486.04	5.64	5.56	1630.16
DEG_G2	19.47	4.12	616.62	4.39	644.6		DEG_G2	16.84	5.6	553.76	2.41	578.61		DEG_G2	23.14	8.41	746.18	2.18	779.91		DEG_G2	12.56	4.25	364.94	1.44	383.19		DEG_G2	16.98	6.91	555	1.35	580.24		DEG_G2	12.88	4.68	364.5	0.92	382.98		DEG_G2	8.76	2.77	177.88	0.56	189.97
DEG_G3	19.32	4.36	4.25	619.31	647.24		DEG_G3	13.55	3.38	2.21	364.58	383.72		DEG_G3	9.01	1.68	1.35	177.69	189.73		DEG_G3	13.26	3.87	1.3	364.6	383.03		DEG_G3	9.32	2.11	1.1	177.7	190.23		DEG_G3	8.66	2.26	0.9	177.26	189.08		DEG_G3	8.18	2.87	0.43	175.88	187.36
DEG_all	0.08	0.1	0.09	0.12	0.39		DEG_all	0.1	0.25	0.22	0.17	0.74		DEG_all	0.18	0.34	0.28	0.11	0.91		DEG_all	0.2	0.22	0.25	0.26	0.93		DEG_all	0.1	0.31	0.4	0.18	0.99		DEG_all	0.1	0.25	0.7	0.33	1.38		DEG_all	0.12	0.26	1.02	0.76	2.16
M-baySeq	nonDEG	DEG_G1	DEG_G2	DEG_G3	Total		M-baySeq	nonDEG	DEG_G1	DEG_G2	DEG_G3	Total		M-baySeq	nonDEG	DEG_G1	DEG_G2	DEG_G3	Total		M-baySeq	nonDEG	DEG_G1	DEG_G2	DEG_G3	Total		M-baySeq	nonDEG	DEG_G1	DEG_G2	DEG_G3	Total		M-baySeq	nonDEG	DEG_G1	DEG_G2	DEG_G3	Total		M-baySeq	nonDEG	DEG_G1	DEG_G2	DEG_G3	Total
nonDEG	7444.06	207.5	207.22	205.41	8064.19		nonDEG	7442.41	297.59	187.77	131.28	8059.05		nonDEG	7442.39	297.37	241.27	69.93	8050.96		nonDEG	7439.93	352.54	130.13	130.29	8052.89		nonDEG	7441.46	351.12	186.57	69.8	8048.95		nonDEG	7437.01	404.04	129.54	69.37	8039.96		nonDEG	7431.25	457.02	67.69	70.26	8026.22
DEG_G1	18.93	616.47	4.72	3.86	643.98		DEG_G1	27.98	943.45	6.13	4.75	982.31		DEG_G1	27.83	943.09	7.55	2.42	980.89		DEG_G1	35.73	1139.45	5.32	5.52	1186.02		DEG_G1	34.35	1140.08	7.04	3.14	1184.61		DEG_G1	43.71	1339.17	6.33	3.88	1393.09		DEG_G1	54.06	1537.61	4.36	4.44	1600.47
DEG_G2	19.08	4.32	616.72	4.28	644.4		DEG_G2	17.08	5.38	553.56	2.53	578.55		DEG_G2	23.13	7.49	749.33	2.39	782.34		DEG_G2	11.95	4	362.86	1.71	380.52		DEG_G2	17.01	6.37	555.01	1.66	580.05		DEG_G2	12.34	4.29	362.75	0.98	380.36		DEG_G2	7.62	2.54	177.19	0.66	188.01
DEG_G3	18.76	4.5	4.19	619.26	646.71		DEG_G3	12.34	3.36	2.34	361.28	379.32		DEG_G3	6.52	1.93	1.69	175.16	185.3		DEG_G3	12.31	3.82	1.51	362.34	379.98		DEG_G3	7.02	2.13	1.15	175.26	185.56		DEG_G3	6.82	2.24	1.08	175.6	185.74		DEG_G3	7.02	2.62	0.53	174.49	184.66
DEG_all	0.17	0.21	0.15	0.19	0.72		DEG_all	0.19	0.22	0.2	0.16	0.77		DEG_all	0.13	0.12	0.16	0.1	0.51		DEG_all	0.08	0.19	0.18	0.14	0.59		DEG_all	0.16	0.3	0.23	0.14	0.83		DEG_all	0.12	0.26	0.3	0.17	0.85		DEG_all	0.05	0.21	0.23	0.15	0.64
EEE-EBSeq	nonDEG	DEG_G1	DEG_G2	DEG_G3	Total		EEE-EBSeq	nonDEG	DEG_G1	DEG_G2	DEG_G3	Total		EEE-EBSeq	nonDEG	DEG_G1	DEG_G2	DEG_G3	Total		EEE-EBSeq	nonDEG	DEG_G1	DEG_G2	DEG_G3	Total		EEE-EBSeq	nonDEG	DEG_G1	DEG_G2	DEG_G3	Total		EEE-EBSeq	nonDEG	DEG_G1	DEG_G2	DEG_G3	Total		EEE-EBSeq	nonDEG	DEG_G1	DEG_G2	DEG_G3	Total
nonDEG	7057.51	80.9	81.09	82.05	7301.55		nonDEG	7060.52	114.68	73.66	52.03	7300.89		nonDEG	7064.12	115.19	93.1	29.09	7301.5		nonDEG	7064.93	132.77	52.43	51.9	7302.03		nonDEG	7069.41	132.78	72.83	29.11	7304.13		nonDEG	7069.69	151.05	52.27	29.86	7302.87		nonDEG	7073.1	170.34	28.72	29.36	7301.52
DEG_G1	146.81	717.76	14.45	13.7	892.72		DEG_G1	188.6	1095.47	16.98	12.01	1313.06		DEG_G1	189.88	1096.18	20.14	6.61	1312.81		DEG_G1	212.77	1326.22	13.86	13.74	1566.59		DEG_G1	211.91	1327.99	17.68	8.01	1565.59		DEG_G1	239	1557.75	14.36	8.42	1819.53		DEG_G1	266.08	1790.91	9.67	9.33	2075.99
DEG_G2	147.37	13.9	718.08	13.5	892.85		DEG_G2	139.09	18.03	643.63	9.33	810.08		DEG_G2	166.95	21.44	871.42	6.36	1066.17		DEG_G2	110.6	16.84	421.64	7.53	556.61		DEG_G2	139.87	19.98	646.49	5.46	811.8		DEG_G2	111.8	19.33	423.16	4.09	558.38		DEG_G2	81.27	15.42	205.58	3.37	305.64
DEG_G3	148.79	14.46	13.9	718.03	895.18		DEG_G3	111.1	14.41	10.06	422.45	558.02		DEG_G3	78.3	10.67	9.14	204.62	302.73		DEG_G3	110.96	16.95	7.59	422.48	557.98		DEG_G3	77.97	11.81	7.24	203.91	300.93		DEG_G3	78.54	13.83	5.4	204.48	302.25		DEG_G3	78.49	15.54	2.89	204.88	301.8
DEG_all	0.52	5.97	5.48	5.72	17.69		DEG_all	0.69	7.4	5.67	4.18	17.94		DEG_all	0.75	6.52	6.2	3.32	16.79		DEG_all	0.74	7.22	4.48	4.35	16.79		DEG_all	0.84	7.44	5.76	3.51	17.55		DEG_all	0.97	8.04	4.81	3.15	16.97		DEG_all	1.06	7.78	3.14	3.06	15.04
SSS-EBSeq	nonDEG	DEG_G1	DEG_G2	DEG_G3	Total		SSS-EBSeq	nonDEG	DEG_G1	DEG_G2	DEG_G3	Total		SSS-EBSeq	nonDEG	DEG_G1	DEG_G2	DEG_G3	Total		SSS-EBSeq	nonDEG	DEG_G1	DEG_G2	DEG_G3	Total		SSS-EBSeq	nonDEG	DEG_G1	DEG_G2	DEG_G3	Total		SSS-EBSeq	nonDEG	DEG_G1	DEG_G2	DEG_G3	Total		SSS-EBSeq	nonDEG	DEG_G1	DEG_G2	DEG_G3	Total
nonDEG	7057.37	80.82	81.07	82.04	7301.3		nonDEG	7060.09	114.72	73.67	52.1	7300.58		nonDEG	7064.29	114.97	92.86	29.21	7301.33		nonDEG	7065.31	132.38	52.45	52.04	7302.18		nonDEG	7068.93	132.25	73.05	29.21	7303.44		nonDEG	7070	150.01	52.4	29.92	7302.33		nonDEG	7073.46	169.16	28.75	29.48	7300.85
DEG_G1	146.66	717.76	14.42	13.72	892.56		DEG_G1	188.78	1095.63	16.93	12.07	1313.41		DEG_G1	189.64	1096.27	19.98	6.59	1312.48		DEG_G1	212.7	1326.7	13.89	13.69	1566.98		DEG_G1	212.48	1328.46	17.68	8.06	1566.68		DEG_G1	238.85	1558.73	14.27	8.36	1820.21		DEG_G1	265.75	1792.04	9.58	9.16	2076.53
DEG_G2	147.62	13.9	718.22	13.57	893.31		DEG_G2	139.23	17.95	643.73	9.37	810.28		DEG_G2	167.05	21.41	871.66	6.34	1066.46		DEG_G2	110.39	16.74	421.47	7.53	556.13		DEG_G2	139.67	19.78	646.11	5.44	811		DEG_G2	111.71	19.2	422.91	4.14	557.96		DEG_G2	81.01	15.31	205.44	3.43	305.19
DEG_G3	148.82	14.54	13.82	717.87	895.05		DEG_G3	111.23	14.39	10.08	422.4	558.1		DEG_G3	78.29	10.7	9.22	204.52	302.73		DEG_G3	110.86	16.83	7.66	422.32	557.67		DEG_G3	78.03	11.85	7.27	203.72	300.87		DEG_G3	78.47	13.76	5.43	204.37	302.03		DEG_G3	78.71	15.5	2.99	204.78	301.98
DEG_all	0.53	5.97	5.47	5.8	17.77		DEG_all	0.67	7.31	5.59	4.06	17.63		DEG_all	0.73	6.65	6.28	3.34	17		DEG_all	0.74	7.35	4.53	4.42	17.04		DEG_all	0.89	7.66	5.89	3.57	18.01		DEG_all	0.97	8.3	4.99	3.21	17.47		DEG_all	1.07	7.98	3.24	3.15	15.44
S-EBSeq	nonDEG	DEG_G1	DEG_G2	DEG_G3	Total		S-EBSeq	nonDEG	DEG_G1	DEG_G2	DEG_G3	Total		S-EBSeq	nonDEG	DEG_G1	DEG_G2	DEG_G3	Total		S-EBSeq	nonDEG	DEG_G1	DEG_G2	DEG_G3	Total		S-EBSeq	nonDEG	DEG_G1	DEG_G2	DEG_G3	Total		S-EBSeq	nonDEG	DEG_G1	DEG_G2	DEG_G3	Total		S-EBSeq	nonDEG	DEG_G1	DEG_G2	DEG_G3	Total
nonDEG	7057.83	80.78	81.04	82.2	7301.85		nonDEG	7024.62	126.75	72.07	48.02	7271.46		nonDEG	7008.17	126.55	95.86	24.82	7255.4		nonDEG	6960.67	154.94	47.94	47.2	7210.75		nonDEG	6953.1	154.96	70.4	24.98	7203.44		nonDEG	6824.75	186.87	47.03	24.89	7083.54		nonDEG	6594.23	223.07	23.68	24.27	6865.25
DEG_G1	146.39	717.8	14.47	13.65	892.31		DEG_G1	217.64	1082.28	20.76	13.31	1333.99		DEG_G1	214.34	1078.91	27.36	6.25	1326.86		DEG_G1	312.68	1303.92	17.76	17.95	1652.31		DEG_G1	308.13	1302.93	26.11	8.74	1645.91		DEG_G1	473.53	1522.17	22.74	11.36	2029.8		DEG_G1	734.74	1739.61	15.3	14.42	2504.07
DEG_G2	147.41	13.89	718.17	13.5	892.97		DEG_G2	136.52	19.93	642.06	7.63	806.14		DEG_G2	163.29	26.59	859.65	5.12	1054.65		DEG_G2	112.39	17.65	421.57	5.54	557.15		DEG_G2	129.58	23.84	637.2	3.97	794.59		DEG_G2	105.28	20.87	414.81	2.44	543.4		DEG_G2	85.1	16.15	198.42	1.87	301.54
DEG_G3	148.85	14.57	13.84	717.81	895.07		DEG_G3	120.49	14.05	7.91	426.03	568.48		DEG_G3	113.27	9.64	7.41	209.76	340.08		DEG_G3	113.41	17.52	5.38	422.22	558.53		DEG_G3	108.08	11.74	5.43	207.56	332.81		DEG_G3	95.23	13.96	3.29	204.63	317.11		DEG_G3	84.4	16.07	1.53	199.06	301.06
DEG_all	0.52	5.95	5.48	5.84	17.79		DEG_all	0.73	6.99	7.2	5.01	19.93		DEG_all	0.93	8.31	9.72	4.05	23.01		DEG_all	0.85	5.97	7.35	7.09	21.26		DEG_all	1.11	6.53	10.86	4.75	23.25		DEG_all	1.21	6.13	12.13	6.68	26.15		DEG_all	1.53	5.1	11.07	10.38	28.08
M-EBSeq	nonDEG	DEG_G1	DEG_G2	DEG_G3	Total		M-EBSeq	nonDEG	DEG_G1	DEG_G2	DEG_G3	Total		M-EBSeq	nonDEG	DEG_G1	DEG_G2	DEG_G3	Total		M-EBSeq	nonDEG	DEG_G1	DEG_G2	DEG_G3	Total		M-EBSeq	nonDEG	DEG_G1	DEG_G2	DEG_G3	Total		M-EBSeq	nonDEG	DEG_G1	DEG_G2	DEG_G3	Total		M-EBSeq	nonDEG	DEG_G1	DEG_G2	DEG_G3	Total
nonDEG	7060.23	80.83	81.19	82.18	7304.43		nonDEG	7059.2	118.89	73.14	50.9	7302.13		nonDEG	7062.36	119.09	94.05	27.92	7303.42		nonDEG	7058.29	140.35	50.87	49.98	7299.49		nonDEG	7061.62	140.62	72.19	27.98	7302.41		nonDEG	7048.63	164.06	50.65	28.09	7291.43		nonDEG	7031.37	190.75	26.94	27.64	7276.7
DEG_G1	145.95	717.64	14.39	13.75	891.73		DEG_G1	190.66	1091.04	18.09	12.33	1312.12		DEG_G1	191.55	1091.51	22.2	6.49	1311.75		DEG_G1	221.54	1318.57	15.11	15.06	1570.28		DEG_G1	221.25	1319.49	19.85	8.27	1568.86		DEG_G1	260.34	1544.51	16.43	9.37	1830.65		DEG_G1	307.79	1770.32	11.17	10.63	2099.91
DEG_G2	146.23	13.91	718.1	13.39	891.63		DEG_G2	138.3	18.78	643.98	8.79	809.85		DEG_G2	165.65	22.92	869.11	5.84	1063.52		DEG_G2	108.95	17.29	422.74	6.74	555.72		DEG_G2	137.21	21.57	645.48	4.98	809.24		DEG_G2	110.03	20.4	423.42	3.48	557.33		DEG_G2	81.18	16.2	205.77	2.67	305.82
DEG_G3	148.06	14.56	13.79	717.85	894.26		DEG_G3	111.16	14.28	9.07	423.76	558.27		DEG_G3	79.67	10.09	8.3	206.16	304.22		DEG_G3	110.56	17.42	6.55	423.62	558.15		DEG_G3	79.06	11.5	6.42	205	301.98		DEG_G3	80.17	13.91	4.36	205.53	303.97		DEG_G3	78.52	16.08	2.34	205.36	302.3
DEG_all	0.53	6.06	5.53	5.83	17.95		DEG_all	0.68	7.01	5.72	4.22	17.63		DEG_all	0.77	6.39	6.34	3.59	17.09		DEG_all	0.66	6.37	4.73	4.6	16.36		DEG_all	0.86	6.82	6.06	3.77	17.51		DEG_all	0.83	7.12	5.14	3.53	16.62		DEG_all	1.14	6.65	3.78	3.7	15.27

## Sheet: Sheet5
	actual FDR values
	PG1	1/3	0.5	0.5	0.6	0.6	0.7	0.8
	PG2	1/3	0.3	0.4	0.2	0.3	0.2	0.1
	PG3	1/3	0.2	0.1	0.2	0.1	0.1	0.1
	PDEG = 0.05
	EEE-baySeq	0.0452691	0.0456886	0.0469456	0.0453449	0.0440138	0.0447211	0.0461141
	SSS-baySeq	0.0462925	0.0444472	0.0458716	0.0463179	0.0443279	0.0452176	0.0466079
	E-baySeq	0.0464483	0.0473183	0.04718	0.0466569	0.0461744	0.0465668	0.0469823
	M-baySeq	0.0442791	0.046268	0.0472368	0.0454068	0.0449136	0.0437849	0.0460212
	EEE-EBSeq	0.333938	0.330556	0.330968	0.332204	0.332472	0.328715	0.329225
	SSS-EBSeq	0.333994	0.330673	0.331135	0.332632	0.332723	0.328895	0.329271
	S-EBSeq	0.338429	0.334895	0.335686	0.337637	0.338079	0.335987	0.337728
	M-EBSeq	0.333316	0.328956	0.329514	0.331198	0.331508	0.327947	0.328583
	PDEG = 0.25
	EEE-baySeq	0.029973	0.0293459	0.0297737	0.0301704	0.029638	0.0298536	0.0307139
	SSS-baySeq	0.029521	0.0297223	0.0299568	0.0299321	0.0298079	0.0300671	0.0306869
	E-baySeq	0.0298742	0.0315494	0.0320476	0.0366186	0.0366338	0.0488126	0.0745786
	M-baySeq	0.0293867	0.0296581	0.0295416	0.0308321	0.0299923	0.0321191	0.0348119
	EEE-EBSeq	0.164309	0.162784	0.161498	0.161201	0.159681	0.159485	0.158151
	SSS-EBSeq	0.164345	0.162925	0.161423	0.161073	0.159816	0.15934	0.157983
	S-EBSeq	0.164207	0.174187	0.17916	0.193266	0.195482	0.231393	0.288791
	M-EBSeq	0.163474	0.163349	0.162259	0.163509	0.162464	0.166577	0.172023

## Sheet: Sheet6
	Sensitivities
	PG1	1/3	0.5	0.5	0.6	0.6	0.7	0.8
	PG2	1/3	0.3	0.4	0.2	0.3	0.2	0.1
	PG3	1/3	0.2	0.1	0.2	0.1	0.1	0.1
	PDEG = 0.05
	EEE-baySeq	0.691557	0.69394	0.69604	0.69824	0.69752	0.6997	0.70708
	SSS-baySeq	0.690719	0.69492	0.69554	0.69832	0.69766	0.69948	0.70736
	E-baySeq	0.691178	0.69426	0.69516	0.69736	0.69594	0.69676	0.70308
	M-baySeq	0.690739	0.69454	0.6949	0.69746	0.6966	0.69858	0.70502
	EEE-EBSeq	0.836946	0.84022	0.83984	0.84236	0.83958	0.845	0.84612
	SSS-EBSeq	0.836786	0.84024	0.84012	0.84246	0.83976	0.84488	0.84624
	S-EBSeq	0.838842	0.84162	0.84064	0.8428	0.84018	0.84402	0.84366
	M-EBSeq	0.836527	0.84048	0.8396	0.84186	0.83962	0.84374	0.84514
	PDEG = 0.25
	EEE-baySeq	0.752097	0.754404	0.75856	0.757648	0.760576	0.76492	0.772828
	SSS-baySeq	0.751309	0.754316	0.758864	0.757964	0.760624	0.765964	0.773464
	E-baySeq	0.751941	0.751484	0.753352	0.750464	0.751768	0.750176	0.743868
	M-baySeq	0.751849	0.753344	0.756572	0.754816	0.757004	0.75882	0.762012
	EEE-EBSeq	0.902309	0.903832	0.905036	0.905152	0.906096	0.906716	0.908616
	SSS-EBSeq	0.902369	0.9038	0.905168	0.905232	0.906176	0.907052	0.909032
	S-EBSeq	0.902337	0.90126	0.901088	0.899956	0.899832	0.896456	0.891588
	M-EBSeq	0.902281	0.902828	0.903576	0.90352	0.903684	0.90288	0.901868

## Sheet: Sheet7
	Specificities
	PG1	1/3	0.5	0.5	0.6	0.6	0.7	0.8
	PG2	1/3	0.3	0.4	0.2	0.3	0.2	0.1
	PG3	1/3	0.2	0.1	0.2	0.1	0.1	0.1
	PDEG = 0.05
	EEE-baySeq	0.998265	0.998244	0.998191	0.998252	0.998305	0.998272	0.998194
	SSS-baySeq	0.998224	0.998294	0.998235	0.998211	0.998293	0.998252	0.998172
	E-baySeq	0.998219	0.998179	0.998183	0.998199	0.998221	0.998202	0.998166
	M-baySeq	0.998306	0.998219	0.998182	0.998248	0.998268	0.998312	0.998202
	EEE-EBSeq	0.977842	0.978157	0.978119	0.977938	0.977987	0.978207	0.978143
	SSS-EBSeq	0.977842	0.978135	0.978102	0.977887	0.97796	0.978193	0.978127
	S-EBSeq	0.977342	0.977687	0.977635	0.977382	0.977408	0.977512	0.977352
	M-EBSeq	0.9779	0.978287	0.978255	0.978034	0.978065	0.978304	0.978205
	PDEG = 0.25
	EEE-baySeq	0.992254	0.992395	0.992237	0.992136	0.992253	0.992149	0.991832
	SSS-baySeq	0.992381	0.992295	0.992185	0.992199	0.992208	0.992081	0.991831
	E-baySeq	0.992281	0.991833	0.991683	0.990487	0.990467	0.987159	0.980003
	M-baySeq	0.992409	0.992321	0.992319	0.991991	0.992195	0.991601	0.990833
	EEE-EBSeq	0.940891	0.941419	0.941899	0.942013	0.942607	0.942636	0.943096
	SSS-EBSeq	0.940875	0.941356	0.941928	0.942057	0.942537	0.942679	0.943137
	S-EBSeq	0.940928	0.936633	0.934432	0.928123	0.927097	0.91	0.879256
	M-EBSeq	0.941239	0.941227	0.941648	0.941105	0.941549	0.939817	0.937516
